# Supplementary material for: Health literacy and adherence to the pharmacological treatment by people with arterial hypertension
Source: PubMed Central journal article supplement (PMC9749777; doi:10.1590/0034-7167-2022-0008), 2022-08-08
Supplement: 0034-7167-reben-75-06-e20220008-sup01.pdf [file 0034-7167-reben-75-06-e20220008-sup01.pdf]

Carimbo de data/hora Voc  viu esta imagem em alguma outra pesquisa? O(A) Senhor(a) aceita participar desta pesquisa? Quais s  o as duas primeiras letras do seu nome? (por exemplo, se voc  se chama Jos  , digite JO) Qual foi o ano em que voc  nasceu? Voc  tem 18 anos ou mais? Qual  o seu grau de instru  o (escolaridade)? Em qual regi  o do Brasil voc  mora hoje? Qual  o seu estado civil? Contando com voc  , quantas pessoas moram na sua casa? Escrever apenas o n  mero. Se morar sozinho(a), escrever 1. Qual  o seu sexo? Voc  tem algum trabalho, hoje, que lhe permite receber um sal  rio? Algum m  dico j  lhe diagnosticou com hipertens  o arterial? Voc  toma algum medicamento (rem  dio) prescrito por um profissional de sa  de para tratamento da hipertens  o arterial? Qual  o seu peso em quilos (aproximadamente)? Escreva apenas os n  meros (exemplo: 95). Qual  a sua altura (aproximadamente)? Escreva apenas os n  meros (exemplo: se voc  tem 1,59, escreva 159). Voc  fuma? Voc  toma bebida alco  lica? Voc  pratica exerc  cio f  sico (pelo menos 3 vezes por semana)? H  quanto tempo voc  foi diagnosticado com hipertens  o arterial? Voc  tem alguma destas doen  as? Voc  pode marcar mais de uma, se for o caso. Incluindo o medicamento para tratamento da hipertens  o, quantos medicamentos, para qualquer finalidade, voc  toma num dia? Escreva apenas o n  mero. Seu m  dico encaminhou voc  para tirar um Raio X de \_\_\_\_\_. Quando vier para o \_\_\_\_\_ voc  deve estar com o est  mago \_\_\_\_\_. O exame de Raio X vai \_\_\_\_\_ de 1 a 3 \_\_\_\_\_.  V  SPERA DO DIA DO RAI O X: No jantar, coma somente um peda  o \_\_\_\_\_ de fruta, torradas e geleia, com \_\_\_\_\_ ou ch  .  V  SPERA DO DIA DO RAI O X: Ap  s \_\_\_\_\_, voc  n  o deve \_\_\_\_\_ nem beber \_\_\_\_\_ at  \_\_\_\_\_ o Raio X. NO DIA DO RAI O X: N  o tome \_\_\_\_\_. NO DIA DO RAI O X: N  o \_\_\_\_\_, nem mesmo \_\_\_\_\_. NO DIA DO RAI O X: Se voc  tiver alguma \_\_\_\_\_, ligue para \_\_\_\_\_ de Raio X no telefone (19) 2222-2821. Eu concordo em dar informa  es corretas para \_\_\_\_\_ receber atendimento adequado neste Hospital. Eu \_\_\_\_\_ que as informa  es que eu \_\_\_\_\_ ao m  dico ser  o muito \_\_\_\_\_ para permitir o correto \_\_\_\_\_. Eu \_\_\_\_\_ que devo relatar para o m  dico qualquer \_\_\_\_\_ nas minhas condi  es dentro de \_\_\_\_\_ (10) dias, a partir do momento em que me tornar \_\_\_\_\_ da altera  o. Eu entendo \_\_\_\_\_ se EU N  O me \_\_\_\_\_ ao tratamento, tenho \_\_\_\_\_ de \_\_\_\_\_ uma nova consulta \_\_\_\_\_ para o hospital. Se voc  \_\_\_\_\_ de ajuda para entender estas \_\_\_\_\_, voc  dever  \_\_\_\_\_ uma enfermeira ou funcion  ria do \_\_\_\_\_ Social para \_\_\_\_\_ todas as suas \_\_\_\_\_. Se voc  tomasse a primeira c  psula  s 7 horas da manh  , a que horas voc  deveria tomar a pr  xima? Escreva o hor  rio. Se essa fosse sua taxa de glicemia hoje, estaria normal? Se este fosse seu cart  o, quando seria sua pr  xima consulta? Escreva a data. Se voc  fosse almo  ar  s 12 horas e quisesse tomar a medica  o antes do almo  o, a que horas voc  deveria tom  -la? Escreva o hor  rio. Voc   s vezes tem problemas em se lembrar de tomar a sua medica  o? Voc   s vezes se descuida de tomar seu medicamento? Quando est  se sentindo melhor, voc   s vezes p  ra de tomar seu medicamento?  s vezes, se voc  se sentir pior ao tomar a medica  o, voc  p  ra de tom  -la?

1/6/2021 18:54:52 N  o SIM, aceito participar. Ama 21/01/1990 Sim Ensino m  dio completo (colegial). Centro-Oeste Casado(a) / Vive junto 2 Feminino Sim Sim Sim 79 165 N  o Sim,  s vezes. N  o Menos de 1 ano. Outra que n  o est  entre as op  es de resposta 2 est  mago raio x, vaziao durar, horas pequeno, caf  a meia-noite, comer, nada, fazer caf  da manh  beba,  gua pergunta, o departamento poder compreendo, transmitir, importantes, diagnostico entendi, altera  o, dez, ciente que, adaptar, direito, solicitar, telefonando precisar, instru  es, procurar, Servi  o, esclarecer, d  vidas 13:00 N  o 07/01/2021 11:00 N  o N  o N  o

1/6/2021 19:36:41 N  o SIM, aceito participar. LI 01/09/1978 Sim Ensino m  dio completo (colegial). Nordeste Separado(a) / Divorciado(a) 4 Feminino N  o Sim Sim 70 160 N  o N  o. N  o Mais de 10 anos. Outra que n  o est  entre as op  es de resposta 1 est  mago raio x, vaziao durar, horas pequeno, caf  a meia-noite, comer, nada, fazer caf  da manh  beba,  gua pergunta, o departamento poder compreendo, transmitir, importantes, diagnostico entendi, altera  o, dez, ciente que, adaptar, direito, solicitar, telefonando precisar, instru  es, procurar, Servi  o, esclarecer, d  vidas 13:00 N  o 07/01/2021 11:00 Sim N  o N  o N  o

1/6/2021 21:16:30 N  o SIM, aceito participar. MA 24/09/1969 Sim P  s-Gradua  o (especializa  o, mestrado e/ou doutorado). Nordeste Casado(a) / Vive junto 4 Feminino Sim Sim Sim 79 149 N  o N  o. N  o Menos de 1 ano. Outra que n  o est  entre as op  es de resposta 4 est  mago raio x, vaziao durar, horas pequeno, caf  a meia-noite, comer, nada, fazer caf  da manh  beba,  gua pergunta, o departamento poder compreendo, transmitir, importantes, diagnostico entendi, altera  o, dez, ciente que, adaptar, direito, solicitar, telefonando precisar, instru  es, procurar, Servi  o, esclarecer, d  vidas 01:00 N  o 07/01/2021 15:00 N  o N  o N  o

1/6/2021 21:37:20 N  o SIM, aceito participar. LU 03/01/1989 Sim P  s-Gradua  o (especializa  o, mestrado e/ou doutorado). Nordeste Solteiro(a) 4 Masculino Sim Sim Sim 87 174 N  o Sim,  s vezes. Sim 5 a 10 anos. Outra que n  o est  entre as op  es de resposta 2 est  mago raio x, vaziao durar, horas pequeno, caf  a meia-noite, comer, nada, fazer caf  da manh  beba,  gua pergunta, o departamento poder compreendo, transmitir, importantes, diagnostico entendi, altera  o, dez, ciente que, adaptar, direito, solicitar, telefonando precisar, instru  es,

procurar, Servir, esclarecer, datas 13:00 N o 01/07/2021 11:00 Sim Sim Sim N o  
1/6/2021 21:54:16 N o SIM, aceito participar. Ve 20/03/2021 Sim P s-Gradua o (especializa o, mestrado e/ou doutorado). Nordeste Casado(a) / Vive junto 5 Feminino Sim Sim Sim 102 175 N o N o. N o 5 a 10 anos. Outra que n o est entre as op es de resposta 3 diabetes raio x, vazio durar, horas pequeno, caf a meia-noite e, comer, nada, fazer caf da manh beba, gua pergunta, o departamento poder compreendo, transmitir, importantes, diagnostico entendi, altera o, dez, ciente que, adaptar, direito, solicitar, telefonando precisar, instru es, procurar, Servir, esclarecer, datas 12 N o 07/01/2021 11 N o Sim N o N o  
1/6/2021 21:55:48 N o SIM, aceito participar. ID 21/01/1971 Sim P s-Gradua o (especializa o, mestrado e/ou doutorado). Nordeste Casado(a) / Vive junto 6 Feminino N o Sim Sim 75 155 N o Sim, s vezes. Sim 5 a 10 anos. Outra que n o est entre as op es de resposta 2 est mago raio x, vazio durar, horas pequeno, caf a meia-noite, comer, nada, fazer caf da manh beba, gua pergunta, o departamento poder compreendo, transmitir, importantes, diagnostico entendi, altera o, dez, ciente que, adaptar, direito, solicitar, telefonando precisar, instru es, procurar, Servir, esclarecer, datas 13h N o 07/01/2021 11h Sim Sim Sim Sim  
1/6/2021 21:57:14 N o SIM, aceito participar. AL 03/10/1961 Sim Ensino fundamental completo. Nordeste Casado(a) / Vive junto 5 Masculino N o Sim Sim 50 155 Sim N o. Sim 1 a 5 anos. Outra que n o est entre as op es de resposta 2 est mago raio x, vazio durar, horas pequeno, caf a meia-noite, comer, nada, fazer caf da manh beba, gua pergunta, o departamento poder compreendo, transmitir, importantes, diagnostico entendi, altera o, dez, ciente que, adaptar, direito, solicitar, telefonando precisar, instru es, procurar, Servir, esclarecer, datas 12 N o 07/01/2021 11 Sim Sim Sim Sim  
1/6/2021 23:13:07 N o SIM, aceito participar. RA 23/06/1994 Sim Ensino superior completo (faculdade/universidade). Nordeste Solteiro(a) 1 Masculino N o Sim Sim 65 168 N o N o. N o Mais de 10 anos. N o, n o tenho nenhuma dessas doen as 0 pontos raio x, vazio durar, horas pequeno, caf a meia-noite, comer, nada, fazer caf da manh beba, gua pergunta, o departamento poder compreendo, transmitir, importantes, diagnostico entendi, altera o, dez, ciente que, adaptar, direito, solicitar, telefonando precisar, instru es, procurar, Servir, esclarecer, datas 13h N o 07/01/2021 11 da manh N o N o N o N o  
1/6/2021 23:21:42 N o SIM, aceito participar. FE 24/11/1989 Sim P s-Gradua o (especializa o, mestrado e/ou doutorado). Nordeste Solteiro(a) 5 Feminino N o Sim Sim 63 153 N o Sim, s vezes. Sim 1 a 5 anos. N o, n o tenho nenhuma dessas doen as 3 est mago raio x, vazio durar, horas pequeno, caf a meia-noite, comer, nada, fazer caf da manh beba, gua pergunta, o departamento poder compreendo, transmitir, importantes, diagnostico entendi, altera o, dez, ciente que, adaptar, direito, solicitar, telefonando precisar, instru es, procurar, Servir, esclarecer, datas 13 N o 07/01/2021 11:00 Sim Sim Sim Sim  
1/6/2021 23:22:24 N o SIM, aceito participar. LU 03/01/1989 Sim P s-Gradua o (especializa o, mestrado e/ou doutorado). Nordeste Solteiro(a) 4 Masculino Sim Sim Sim 87 174 N o Sim, s vezes. Sim 5 a 10 anos. Outra que n o est entre as op es de resposta 2 est mago raio x, vazio durar, horas pequeno, caf a meia-noite, comer, nada, fazer caf da manh beba, gua pergunta, o departamento poder compreendo, transmitir, importantes, diagnostico entendi, altera o, dez, ciente que, adaptar, direito, solicitar, telefonando precisar, instru es, procurar, Servir, esclarecer, datas 13:00 N o 01/07/2021 11:00 Sim Sim Sim N o  
1/7/2021 4:17:37 N o SIM, aceito participar. ER 25/04/2021 Sim Ensino m dio completo (colegial). Nordeste Casado(a) / Vive junto 04 Feminino Sim Sim Sim 58 150 N o Sim, s vezes. Sim Menos de 1 ano. N o, n o tenho nenhuma dessas doen as 02 est mago raio x, vazio durar, horas pequeno, caf a meia-noite, comer, nada, fazer caf da manh beba, gua pergunta, o departamento poder compreendo, transmitir, importantes, diagnostico entendi, altera o, dez, ciente que, adaptar, direito, solicitar, telefonando precisar, instru es, procurar, Servir, esclarecer, datas 1 hora N o 07/01/2021 11h Sim Sim Sim Sim  
1/7/2021 7:34:24 N o SIM, aceito participar. WI 18/06/1997 Sim Ensino superior completo (faculdade/universidade). Nordeste Casado(a) / Vive junto 2 Feminino Sim Sim Sim 63 162 N o N o. Sim Menos de 1 ano. Outra que n o est entre as op es de resposta 8 est mago raio x, vazio durar, horas pequeno, caf a meia-noite, comer, nada, fazer caf da manh beba, gua pergunta, o departamento poder compreendo, transmitir, importantes, diagnostico entendi, altera o, dez, ciente que, adaptar, direito, solicitar, telefonando precisar, instru es, procurar, Servir, esclarecer, datas 13 N o 07/01/2021 11 Sim Sim N o Sim  
1/7/2021 18:41:37 N o SIM, aceito participar. MA 10/06/1975 Sim Ensino m dio completo (colegial). Nordeste Casado(a) / Vive junto 4 Feminino N o Sim Sim 110 175 N o Sim, s vezes. N o 5 a 10 anos. N o, n o tenho nenhuma dessas doen as 0 est mago raio x, vazio durar, horas pequeno, caf a meia-noite, comer, nada, fazer caf da manh beba, gua pergunta, o departamento poder compreendo, transmitir, importantes, diagnostico entendi, altera o, dez, ciente que, adaptar, direito, solicitar, telefonando precisar, instru es, procurar, Servir, esclarecer, datas 13 N o 14/01/2021 11 N o N o N o N o

1/7/2021 20:36:49 N o SIM, aceito participar. Ca 08/04/1982 Sim Ensino m dio completo (colegial). Nordeste Casado(a) / Vive junto 4 Feminino N o Sim Sim 83 160 N o Sim, s vezes. N o 1 a 5 anos. Outra que n o est entre as op es de resposta 1 est mago raio x, vazio durar, horas pequeno, caf a meia-noite, comer, nada, fazer caf da manh beba, gua pergunta, o departamento poder compreendo, transmitir, importantes, diagn stico entendi, altera o, dez, ciente que, adaptar, direito, solicitar, telefonando precisar, instru es, procurar, Servi o, esclarecer, d vidas 13 N o 14/01/2021 11 Sim Sim N o N o

1/7/2021 21:03:21 N o SIM, aceito participar. AR 17/01/1966 Sim Ensino fundamental completo. Nordeste Casado(a) / Vive junto 3 Feminino Sim Sim Sim 76 165 N o N o. N o 1 a 5 anos. Outra que n o est entre as op es de resposta, N o, n o tenho nenhuma dessas doen as 3 est mago raio x, vazio durar, horas pequeno, caf a meia-noite, comer, nada, fazer caf da manh beba, gua pergunta, o departamento poder compreendo, transmitir, importantes, diagn stico entendi, altera o, dez, ciente que, adaptar, direito, solicitar, telefonando precisar, instru es, procurar, Servi o, esclarecer, d vidas 13 horas N o 14/01/2021 11h N o N o N o Sim

1/7/2021 23:55:54 N o SIM, aceito participar. Ka 06/12/1982 Sim P s-Gradua o (especializa o, mestrado e/ou doutorado). Nordeste Separado(a) / Divorciado(a) 3 Feminino Sim Sim Sim 79 157 N o N o. Sim 1 a 5 anos. N o, n o tenho nenhuma dessas doen as 1 est mago raio x, vazio durar, horas pequeno, caf a meia-noite, comer, nada, fazer caf da manh beba, gua pergunta, o departamento poder compreendo, transmitir, importantes, diagn stico entendi, altera o, dez, ciente que, adaptar, direito, solicitar, telefonando precisar, instru es, procurar, Servi o, esclarecer, d vidas 13 N o 14/01/2021 11 Sim Sim Sim Sim

1/8/2021 23:10:47 N o SIM, aceito participar. Th 29/12/1988 Sim Ensino m dio completo (colegial). Sudeste Casado(a) / Vive junto 8 Feminino N o Sim Sim 108 164 N o Sim, s vezes. N o Menos de 1 ano. N o, n o tenho nenhuma dessas doen as 5 est mago raio x, vazio durar, horas pequeno, caf a meia-noite, comer, nada, fazer caf da manh beba, gua pergunta, o departamento poder compreendo, transmitir, importantes, diagn stico entendi, altera o, dez, ciente que, adaptar, direito, solicitar, telefonando precisar, instru es, procurar, Servi o, esclarecer, d vidas 13 N o 14/01/2021 11 horas da manh Sim Sim Sim Sim

1/10/2021 8:48:23 N o SIM, aceito participar. Mi 12/10/1977 Sim Ensino m dio completo (colegial). Sudeste Casado(a) / Vive junto 3 Feminino N o Sim Sim 116 170 N o Sim, s vezes. N o Mais de 10 anos. Outra que n o est entre as op es de resposta 6 pontos raio x, vazio durar, horas pequeno, caf a meia-noite, comer, nada, fazer caf da manh beba, gua pergunta, o departamento poder compreendo, transmitir, importantes, diagn stico entendi, altera o, dez, ciente que, adaptar, direito, solicitar, telefonando precisar, instru es, procurar, Servi o, esclarecer, d vidas 13 N o 14/01/2021 11 Sim Sim Sim N o

1/11/2021 20:36:37 N o SIM, aceito participar. Br 17/01/1995 Sim Ensino fundamental completo. Sudeste Solteiro(a) 4 Feminino N o Sim Sim 135 165 Sim Sim, s vezes. Sim 1 a 5 anos. N o, n o tenho nenhuma dessas doen as 8 est mago raio x, vazio durar, horas pequeno, caf a meia-noite, comer, nada, fazer caf da manh beba, gua pergunta, o departamento poder compreendo, transmitir, importantes, diagn stico entendi, altera o, dez, ciente que, adaptar, direito, solicitar, telefonando precisar, instru es, procurar, Servi o, esclarecer, d vidas 13 hrs N o 11/01/2021 11 hrs N o N o N o N o

1/12/2021 6:19:44 N o SIM, aceito participar. Ra 04/01/1984 Sim Ensino m dio completo (colegial). Centro-Oeste Casado(a) / Vive junto 3 Feminino Sim Sim Sim 110 173 N o N o. N o Mais de 10 anos. Diabetes, Outra que n o est entre as op es de resposta 5 est mago raio x, vazio durar, horas pequeno, caf a meia-noite, comer, nada, fazer caf da manh beba, gua pergunta, o departamento poder compreendo, transmitir, importantes, diagn stico entendi, altera o, dez, ciente que, adaptar, direito, solicitar, telefonando precisar, instru es, procurar, Servi o, esclarecer, d vidas 13hrs N o 14/01/2021 As 11hrs Sim Sim Sim Sim

1/14/2021 14:54:54 N o SIM, aceito participar. Ju 1975 Sim Ensino m dio completo (colegial). Sudeste Casado(a) / Vive junto 3 Feminino Sim Sim Sim 100 159 N o Sim, s vezes. N o 5 a 10 anos. N o, n o tenho nenhuma dessas doen as 1 est mago raio x, vazio durar, horas pequeno, caf a meia-noite, comer, nada, fazer caf da manh beba, gua pergunta, o departamento poder compreendo, transmitir, importantes, diagn stico entendi, altera o, dez, ciente que, adaptar, direito, solicitar, telefonando precisar, instru es, procurar, Servi o, esclarecer, d vidas 13:00 N o 17/09/2020 11:00hs. N o Sim N o N o

1/14/2021 17:34:28 N o SIM, aceito participar. El 1973 Sim P s-Gradua o (especializa o, mestrado e/ou doutorado). Sudeste Casado(a) / Vive junto 5 Feminino Sim Sim Sim 80 170 N o N o. N o Menos de 1 ano. Outra que n o est entre as op es de resposta 3 est mago raio x, vazio durar, horas pequeno, caf a meia-noite, comer, nada, fazer caf da manh beba, gua pergunta, o departamento poder compreendo, transmitir, importantes, diagn stico entendi, altera o, dez, ciente que, adaptar, direito, solicitar, telefonando precisar, instru es, procurar, Servi o, esclarecer, d vidas 13 N o 14/07/2021 1 N o N o N o N o

1/14/2021 18:21:40 N o SIM, aceito participar. Ca 71 Sim Ensino m dio completo (colegial). Sudeste Casado(a)

/ Vive junto 3 Feminino Sim Sim Sim 96 159 N o N o. Sim 1 a 5 anos. N o, n o tenho nenhuma dessas doen as 3 est mago raio x, vazio durar, horas pequeno, caf a meia-noite, comer, nada, fazer caf da manh beba, gua pergunta, o departamento poder compreendo, transmitir, importantes, diagn stico entendi, altera o, dez, ciente que, adaptar, direito, solicitar, telefonando precisar, instru es, procurar, Servi o, esclarecer, d vidas 13 horas N o 21/01/2021 11horas N o N o N o N o  
1/15/2021 1:03:13 N o SIM, aceito participar. Te 1976 Sim Ensino superior completo (faculdade/universidade). Su deste Solteiro(a) 2 Feminino Sim Sim Sim 80 163 N o N o. N o 1 a 5 anos. N o, n o tenho nenhuma dessas doen as 2 est mago raio x, vazio durar, horas pequeno, caf a meia-noite, comer, nada, fazer caf da manh beba, gua pergunta, o departamento poder compreendo, transmitir, importantes, diagn stico entendi, altera o, dez, ciente que, adaptar, direito, solicitar, telefonando precisar, instru es, procurar, Servi o, esclarecer, d vida s As 13 N o 21/01/2021 As 11 N o Sim N o N o  
1/15/2021 1:30:10 N o SIM, aceito participar. Mi 1975 Sim Ensino superior completo (faculdade/universidade). N ordeste Casado(a) / Vive junto 3 Feminino Sim Sim Sim 79 157 N o Sim, s vezes. Sim 5 a 10 anos. Diabetes 4 e st mago raio x, vazio durar, horas pequeno, caf a meia-noite, comer, nada, fazer caf da manh beba, gua p ergunta, o departamento poder compreendo, transmitir, importantes, diagn stico entendi, altera o, dez, ciente q ue, adaptar, direito, solicitar, telefonando precisar, instru es, procurar, Servi o, esclarecer, d vidas 13 horas N o 21/01/2021 11 horas N o N o N o N o  
1/15/2021 1:31:37 N o SIM, aceito participar. Th 1979 Sim P s-Gradua o (especializa o, mestrado e/ou doutorado). Sul Casado(a) / Vive junto 3 Feminino Sim Sim Sim 80 172 N o Sim, s vezes. Sim Menos de 1 ano. N o, n o tenho nenhuma dessas doen as 1 pontos raio x, vazio durar, horas pequeno, caf a meia-noite, comer, nada, fazer caf da manh beba, gua pergunta, o departamento poder compreendo, transmitir, importantes, dia gn stico entendi, altera o, dez, ciente que, adaptar, direito, solicitar, telefonando precisar, instru es, procura r, Servi o, esclarecer, d vidas 13 N o 14/01/2021 12 Sim Sim Sim Sim  
1/15/2021 5:19:19 N o SIM, aceito participar. MA 1992 Sim Ensino superior completo (faculdade/universidade). S udeste Solteiro(a) 5 Feminino N o Sim Sim 76 173 N o N o. Sim Menos de 1 ano. N o, n o tenho nenhuma dessas doen as 0 diabetes raio x, vazio durar, horas pequeno, caf a meia-noite, comer, nada, fazer caf da manh beba, gua pergunta, o departamento poder compreendo, transmitir, importantes, diagn stico entendi, altera o, dez, ciente que, adaptar, direito, solicitar, telefonando precisar, instru es, procurar, Servi o, esclarecer, d o vidas 13h N o 21/01/2021 11h N o N o N o N o  
1/15/2021 9:39:42 N o SIM, aceito participar. MJ 1976 Sim Ensino superior completo (faculdade/universidade). N ordeste Casado(a) / Vive junto 3 Masculino Sim Sim Sim 110 170 N o Sim, s vezes. N o Mais de 10 anos. Dia betes, Doen a nos rins 2 est mago raio x, vazio durar, horas pequeno, caf a meia-noite, comer, nada, fazer caf da manh beba, gua pergunta, o departamento poder compreendo, transmitir, importantes, diagn stico enten di, altera o, dez, ciente que, adaptar, direito, solicitar, telefonando precisar, instru es, procurar, Servi o, esc larecer, d vidas 13 horas N o 21/01/2021 11 horas Sim Sim N o N o  
1/15/2021 10:29:41 N o SIM, aceito participar. TA 1989 Sim P s-Gradua o (especializa o, mestrado e/ou doutorado). Nordeste Casado(a) / Vive junto 3 Feminino Sim Sim Sim 82 154 N o Sim, s vezes. N o Menos d e 1 ano. N o, n o tenho nenhuma dessas doen as 0 est mago raio x, vazio durar, horas pequeno, caf a meia-noite, comer, nada, fazer caf da manh beba, gua pergunta, o departamento poder compreendo, transmitir, imp ortantes, diagn stico entendi, altera o, dez, ciente que, adaptar, direito, solicitar, telefonando precisar, instru es, procurar, Servi o, esclarecer, d vidas 13 N o 21/01/2021 11:30 Sim Sim Sim Sim  
1/15/2021 10:49:46 Sim SIM, aceito participar. Jo 1990 Sim Ensino superior completo (faculdade/universidade). No rte Casado(a) / Vive junto 3 Masculino N o Sim Sim 97 175 N o Sim, s vezes. Sim Menos de 1 ano. N o, n o tenho nenhuma dessas doen as 0 vermes raio x, vazio durar, horas pequeno, caf a meia-noite, comer, nada, f azer caf da manh beba, gua pergunta, o departamento poder compreendo, transmitir, importantes, diagn stic o entendi, altera o, dez, ciente que, adaptar, direito, solicitar, telefonando precisar, instru es, procurar, Servi o, esclarecer, d vidas 13h N o 21/01/2021 11h30 N o N o N o Sim  
1/15/2021 10:57:23 N o SIM, aceito participar. Cr 1987 Sim Ensino m dio completo (colegial). Centro-Oeste Ca sado(a) / Vive junto 5 Feminino Sim Sim Sim 90 167 N o N o. N o 5 a 10 anos. N o, n o tenho nenhuma de ssas doen as 0 pontos raio x, vazio durar, horas pequeno, caf a meia-noite, comer, nada, fazer caf da manh beba, gua pergunta, o departamento poder compreendo, transmitir, importantes, diagn stico entendi, altera o, dez, ciente que, adaptar, direito, solicitar, telefonando precisar, instru es, procurar, Servi o, esclarecer, d vid as 13:00 N o 21/01/2021 7:00 Sim Sim Sim Sim  
1/15/2021 11:04:18 N o SIM, aceito participar. Ro 1974 Sim P s-Gradua o (especializa o, mestrado e/ou doutorado). Sudeste Separado(a) / Divorciado(a) 1 Feminino Sim Sim Sim 89 157 N o N o. Sim Menos de 1 ano

. Outra que não o está entre as opções de resposta 2 pontos raio x, vazio durar, horas pequeno, café a meia-noite, comer, nada, fazer café da manhã beba, sua pergunta, o departamento poder compreendo, transmitir, importantes, diagnóstico entendi, altera-o, dez, ciente que, adaptar, direito, solicitar, telefonando precisar, instruções, procurar, Serviço, esclarecer, datas 13 N 21/01/2021 11 Sim N N Sim  
1/15/2021 12:44:39 N SIM, aceito participar. DA 1970 Sim Pós-Graduação (especialização, mestrado e/ou doutorado). Nordeste Separado(a) / Divorciado(a) 4 Feminino Sou aposentado(a) / pensionista Sim Sim 66 160 N N 5 a 10 anos. N, não tenho nenhuma dessas doenças 3 está mago raio x, vazio durar, horas pequeno, café a meia-noite, comer, nada, fazer café da manhã beba, sua pergunta, o departamento poder compreendo, transmitir, importantes, diagnóstico entendi, altera-o, dez, ciente que, adaptar, direito, solicitar, telefonando precisar, instruções, procurar, Serviço, esclarecer, datas 13 N 21/01/2021 11 N N N

1/15/2021 14:13:57 N SIM, aceito participar. AD 1972 Sim Pós-Graduação (especialização, mestrado e/ou doutorado). Nordeste Casado(a) / Vive junto 4 Feminino Sim Sim Sim 47 147 N N. Sim 1 a 5 anos. Outra que não o está entre as opções de resposta 3 está mago raio x, vazio durar, horas pequeno, café a meia-noite, comer, nada, fazer café da manhã beba, sua pergunta, o departamento poder compreendo, transmitir, importantes, diagnóstico entendi, altera-o, dez, ciente que, adaptar, direito, solicitar, telefonando precisar, instruções, procurar, Serviço, esclarecer, datas 13 N 21/01/2021 11 N N N N

1/15/2021 17:17:10 N SIM, aceito participar. An 1981 Sim Ensino médio completo (colegial). Nordeste Casado(a) / Vive junto 5 Feminino N Sim Sim 106 167 N N. N 1 a 5 anos. N, não tenho nenhuma dessas doenças 4 está mago raio x, vazio durar, horas pequeno, café a meia-noite, comer, nada, fazer café da manhã beba, sua pergunta, o departamento poder compreendo, transmitir, importantes, diagnóstico entendi, altera-o, dez, ciente que, adaptar, direito, solicitar, telefonando precisar, instruções, procurar, Serviço, esclarecer, datas Uma da manhã N 14/01/2021 11 Sim Sim N N

1/15/2021 21:17:22 N SIM, aceito participar. Iz 1953 Sim Pós-Graduação (especialização, mestrado e/ou doutorado). Sudeste Viúva(a) 3 Feminino Sou aposentado(a) / pensionista Sim Sim 64 165 N Sim, às vezes. Sim Mais de 10 anos. Diabetes, Outra que não o está entre as opções de resposta 5 está mago raio x, vazio durar, horas pequeno, café a meia-noite, comer, nada, fazer café da manhã beba, sua pergunta, o departamento poder compreendo, transmitir, importantes, diagnóstico entendi, altera-o, dez, ciente que, adaptar, direito, solicitar, telefonando precisar, instruções, procurar, Serviço, esclarecer, datas 13 N 17/09/2020 11 N N N Sim

1/16/2021 0:53:20 N SIM, aceito participar. De 1985 Sim Ensino médio completo (colegial). Nordeste Solteiro(a) 5 Feminino N Sim Sim 100 169 N N. N Mais de 10 anos. Diabetes, Doença nos rins, Outra que não o está entre as opções de resposta 2 diabetes raio x, vazio durar, horas pequeno, café antes, pedir, algum, estar café da manhã beba, sua tarefa, a farmácia poder compreendo, transmitir, importantes, diagnóstico entendi, altera-o, dez, ciente que, adaptar, direito, solicitar, telefonando precisar, instruções, procurar, Serviço, esclarecer, datas 13 N 14/02/2021 9 Sim Sim Sim Sim

1/16/2021 1:38:03 N SIM, aceito participar. Ri 1959 Sim Ensino médio completo (colegial). Sudeste Casado(a) / Vive junto 2 Masculino Sou aposentado(a) / pensionista Sim Sim 96 180 N Sim, às vezes. N Mais de 10 anos. Infarto, Doença arterial coronariana (fiz cateterismo nos vasos do coração) 8 pontos raio x, vazio durar, horas pequeno, café a meia-noite, comer, nada, fazer café da manhã beba, sua pergunta, o departamento poder compreendo, transmitir, importantes, diagnóstico entendi, altera-o, dez, ciente que, adaptar, direito, solicitar, telefonando precisar, instruções, procurar, Serviço, esclarecer, datas 13 N 21/01/2021 11 N N N N

1/16/2021 4:49:36 N SIM, aceito participar. Ci 1977p Sim Ensino fundamental completo. Centro-Oeste Viúva(a) 1 Feminino Sou aposentado(a) / pensionista Sim Sim 110 170 N Sim, às vezes. Sim Mais de 10 anos. Diabetes 2 está mago raio x, vazio durar, horas pequeno, café a meia-noite, comer, nada, fazer café da manhã beba, sua pergunta, o departamento poder compreendo, transmitir, importantes, diagnóstico entendi, altera-o, dez, ciente que, adaptar, direito, solicitar, telefonando precisar, instruções, procurar, Serviço, esclarecer, datas 13hs N 21/01/2021 11hs N N N Sim

1/16/2021 6:11:24 N SIM, aceito participar. LU 1957 Sim Ensino superior completo (faculdade/universidade). Nordeste Casado(a) / Vive junto 2 Feminino Sou aposentado(a) / pensionista Sim Sim 55 158 N N. Sim Mais de 10 anos. N, não tenho nenhuma dessas doenças 3 está mago raio x, vazio durar, horas pequeno, café a meia-noite, comer, nada, fazer café da manhã beba, sua pergunta, o departamento poder compreendo, transmitir, importantes, diagnóstico entendi, altera-o, dez, ciente que, adaptar, direito, solicitar, telefonando precisar, instruções, procurar, Serviço, esclarecer, datas 13 N 21/01/2021 11:00 N N N Sim

1/16/2021 10:03:06 N o SIM, aceito participar. MA 1975 Sim Ensino m dio completo (colegial). Sudeste Separado(a) / Divorciado(a) 2 Feminino N o Sim Sim 75 160 N o Sim, s vezes. N o 5 a 10 anos. Diabetes 4 est mago raio x, vaziao durar, horas pequeno, caf a meia-noite, comer, nada, fazer caf da manh beba, gua pergunta, o departamento poder compreendo, transmitir, importantes, diagn stico entendi, altera o, dez, ciente que, adaptar, direito, solicitar, telefonando precisar, instru es, procurar, Servio, esclarecer, d vidas 13 horas N o 21/01/2021 11 horas Sim Sim N o Sim

1/16/2021 11:01:36 N o SIM, aceito participar. Ta 1950 Sim Ensino superior completo (faculdade/universidade). Sudeste Casado(a) / Vive junto 2 Feminino Sou aposentado(a) / pensionista Sim Sim 80 159 N o Sim, s vezes. N o Mais de 10 anos. Diabetes 2 est mago raio x, vaziao durar, horas pequeno, caf a meia-noite, comer, nada, fazer caf da manh beba, gua pergunta, o departamento poder compreendo, transmitir, importantes, diagn stico entendi, altera o, dez, ciente que, adaptar, direito, solicitar, telefonando precisar, instru es, procurar, Servio, esclarecer, d vidas 13 N o 21/01/2021 11 N o N o N o N o

1/16/2021 18:11:56 N o SIM, aceito participar. Ja 11.09.1999 Sim N o frequentei escola. Sudeste Solteiro(a) 3 Feminino Sou aposentado(a) / pensionista Sim Sim 21 128 N o N o. N o 5 a 10 anos. Outra que n o est entre as op es de resposta 5 est mago raio x, vaziao durar, horas pequeno, caf a meia-noite, comer, nada, fazer caf da manh beba, gua resposta, disque poder compreendo, transmitir, importantes, diagn stico entendi, altera o, dez, ciente que, adaptar, direito, solicitar, telefonando precisar, instru es, procurar, Servio, esclarecer, d vidas 9 horas N o 14/01/2021 09 horas N o N o N o Sim

1/16/2021 22:48:24 N o SIM, aceito participar. Ma 1954 Sim Ensino m dio completo (colegial). Sudeste Vi o(a) 3 Feminino Sou aposentado(a) / pensionista Sim Sim 74 162 Sim N o. N o Mais de 10 anos. N o, n o tenho nenhuma dessas doen as 7 est mago raio x, vaziao durar, horas pequeno, caf a meia-noite, comer, nada, fazer caf da manh beba, gua pergunta, o departamento poder compreendo, transmitir, importantes, diagn stico entendi, altera o, dez, ciente que, adaptar, direito, solicitar, telefonando precisar, instru es, procurar, Servio, esclarecer, d vidas 13h N o 21/01/2021 11h N o N o N o N o

1/16/2021 23:14:38 N o SIM, aceito participar. DP 1978 Sim P s-Gradua o (especializa o, mestrado e/ou doutorado). Sudeste Solteiro(a) 4 Masculino Sim Sim Sim 92 170 N o N o. Sim Mais de 10 anos. Outra que n o est entre as op es de resposta 4 est mago raio x, vaziao durar, horas pequeno, caf a meia-noite, comer, nada, fazer caf da manh beba, gua pergunta, o departamento poder compreendo, transmitir, importantes, diagn stico entendi, altera o, dez, ciente que, adaptar, direito, solicitar, telefonando precisar, instru es, procurar, Servio, esclarecer, d vidas 13 N o 21/01/2021 11 N o N o N o Sim

1/17/2021 5:28:42 N o SIM, aceito participar. Ca 1960 Sim Ensino superior completo (faculdade/universidade). Nordeste Solteiro(a) 1 Feminino N o Sim Sim 70 158 N o N o. N o Mais de 10 anos. Diabetes, Outra que n o est entre as op es de resposta 10 est mago raio x, vaziao durar, horas pequeno, caf a meia-noite, comer, nada, fazer caf da manh beba, gua pergunta, o departamento poder compreendo, transmitir, importantes, diagn stico entendi, altera o, dez, ciente que, adaptar, direito, solicitar, telefonando precisar, instru es, procurar, Servio, esclarecer, d vidas Ablock 10h N o 22/01/2021 10h N o Sim N o N o

1/17/2021 14:20:23 N o SIM, aceito participar. An 1971 Sim Ensino superior completo (faculdade/universidade). Sudeste Casado(a) / Vive junto 4 Feminino Sim Sim Sim 110 170 N o N o. N o 5 a 10 anos. Diabetes, Outra que n o est entre as op es de resposta 4 est mago raio x, vaziao durar, horas pequeno, caf a meia-noite, comer, nada, fazer caf da manh beba, gua pergunta, o departamento poder compreendo, transmitir, importantes, diagn stico entendi, altera o, dez, ciente que, adaptar, direito, solicitar, telefonando precisar, instru es, procurar, Servio, esclarecer, d vidas 13 N o 21/01/2021 11 N o N o N o N o

1/17/2021 15:24:15 N o SIM, aceito participar. Lu 1964 Sim P s-Gradua o (especializa o, mestrado e/ou doutorado). Sudeste Casado(a) / Vive junto 2 Feminino N o Sim Sim 53 163 N o N o. Sim 5 a 10 anos. N o, n o tenho nenhuma dessas doen as 2 est mago raio x, vaziao durar, horas pequeno, caf a meia-noite, comer, nada, fazer caf da manh beba, gua pergunta, o departamento poder compreendo, transmitir, importantes, diagn stico entendi, altera o, dez, ciente que, adaptar, direito, solicitar, telefonando precisar, instru es, procurar, Servio, esclarecer, d vidas 13 hs N o 21/01/2021 11 hs Sim N o N o N o

1/17/2021 16:20:25 N o SIM, aceito participar. Sa 1967 Sim Ensino superior completo (faculdade/universidade). Sudeste Casado(a) / Vive junto 3 Feminino N o Sim Sim 75 155 N o N o. Sim Mais de 10 anos. N o, n o tenho nenhuma dessas doen as 5 est mago raio x, vaziao durar, horas pequeno, caf a meia-noite, comer, nada, fazer caf da manh beba, gua pergunta, o departamento poder compreendo, transmitir, importantes, diagn stico entendi, altera o, dez, ciente que, adaptar, direito, solicitar, telefonando precisar, instru es, procurar, Servio, esclarecer, d vidas 13 N o 21/01/2021 11 N o N o N o N o

1/17/2021 18:32:35 N o SIM, aceito participar. CA 1998 Sim Ensino superior completo (faculdade/universidade).

Nordeste Solteiro(a) 7 Masculino Sim Sim Sim 140 180 Sim Sim, □ s vezes. N□ o 5 a 10 anos. N□ o, n□ o tenho nenhuma dessas doen□ as 3 est□ mago raio x, vazio durar, horas pequeno, caf□ a meia-noite, comer, nada, fazer caf□ da manh□ beba, □ gua pergunta, o departamento poder compreendo, transmitir, importantes, diagn□ stico entendi, altera□ □ o, dez, ciente que, adaptar, direito, solicitar, telefonando precisar, instru□ □ es, procurar, Servi□ o, esclarecer, d□ vidas 13 Sim 28/04/2021 11 Sim Sim Sim Sim

1/17/2021 19:53:21 N□ o SIM, aceito participar. Ma 1952 Sim Ensino superior completo (faculdade/universidade).

Sudeste Casado(a) / Vive junto 2 Feminino Sou aposentado(a) / pensionista Sim Sim 64 160 N□ o N□ o. Sim Mais de 10 anos. Diabetes 2 est□ mago raio x, vazio durar, horas pequeno, caf□ a meia-noite, comer, nada, fazer caf□ da manh□ beba, □ gua pergunta, o departamento poder compreendo, transmitir, importantes, diagn□ stico entendi, altera□ □ o, dez, ciente que, adaptar, direito, solicitar, telefonando precisar, instru□ □ es, procurar, Servi□ o, esclarecer, d□ vidas 13 horas N□ o 21/01/2021 07 N□ o N□ o N□ o N□ o

1/17/2021 23:27:27 N□ o SIM, aceito participar. IS 1996 Sim Ensino m□ dio completo (colegial). Sudeste Separado(a) / Divorciado(a) 4 Feminino Sou aposentado(a) / pensionista Sim Sim 105 169 N□ o N□ o. N□ o 5 a 10 anos. Outra que n□ o est□ entre as op□ □ es de resposta 20 est□ mago raio x, vazio durar, horas pequeno, caf□ a meia-noite, comer, nada, fazer caf□ da manh□ beba, □ gua pergunta, o departamento poder compreendo, transmitir, importantes, diagn□ stico entendi, altera□ □ o, dez, ciente que, adaptar, direito, solicitar, telefonando precisar, instru□ □ es, procurar, Servi□ o, esclarecer, d□ vidas 13h N□ o 21/01/2021 11h N□ o N□ o N□ o N□ o

1/18/2021 0:56:06 N□ o SIM, aceito participar. SI 1970 Sim Ensino m□ dio completo (colegial). Sudeste Solteiro(a) 3 Feminino Sou aposentado(a) / pensionista Sim N□ o 42 140 N□ o N□ o. N□ o 5 a 10 anos. N□ o, n□ o tenho nenhuma dessas doen□ as 2 est□ mago raio x, vazio durar, horas pequeno, caf□ a meia-noite, comer, nada, fazer caf□ da manh□ beba, □ gua pergunta, o departamento poder compreendo, transmitir, importantes, diagn□ stico entendi, altera□ □ o, dez, ciente que, adaptar, direito, solicitar, telefonando precisar, instru□ □ es, procurar, Servi□ o, esclarecer, d□ vidas 14h N□ o 21/01/2021 11h Sim Sim N□ o N□ o

1/18/2021 8:34:18 N□ o SIM, aceito participar. RE 1976 Sim Ensino superior completo (faculdade/universidade). Sudeste Casado(a) / Vive junto 4 Feminino N□ o Sim Sim 91 160 N□ o N□ o. N□ o 5 a 10 anos. Diabetes 2 diabetes raio x, vazio durar, horas pequeno, caf□ a meia-noite, comer, nada, fazer caf□ da manh□ beba, □ gua pergunta, o departamento poder compreendo, transmitir, importantes, diagn□ stico entendi, altera□ □ o, dez, ciente que, adaptar, direito, solicitar, telefonando precisar, instru□ □ es, procurar, Servi□ o, esclarecer, d□ vidas 13 Sim 21/01/2021 11 N□ o Sim N□ o Sim

1/18/2021 10:49:49 N□ o SIM, aceito participar. CI1963 1963 Sim Ensino m□ dio completo (colegial). Nordeste Solteiro(a) 3 Feminino N□ o Sim Sim 69 149 Sim N□ o. N□ o Mais de 10 anos. Diabetes, Outra que n□ o est□ entre as op□ □ es de resposta 12 est□ mago raio x, vazio durar, horas pequeno, caf□ a meia-noite, comer, nada, fazer caf□ da manh□ beba, □ gua pergunta, o departamento poder compreendo, transmitir, importantes, diagn□ stico entendi, altera□ □ o, dez, ciente que, adaptar, direito, solicitar, telefonando precisar, instru□ □ es, procurar, Servi□ o, esclarecer, d□ vidas 7 da noite Sim 17/02/2021 11h N□ o N□ o N□ o N□ o

1/18/2021 13:45:22 N□ o SIM, aceito participar. JO 1958 Sim Ensino m□ dio completo (colegial). Sudeste Casado(a) / Vive junto 3 Feminino Sou aposentado(a) / pensionista Sim Sim 68 163 N□ o N□ o. N□ o Mais de 10 anos. N□ o, n□ o tenho nenhuma dessas doen□ as 1 est□ mago raio x, vazio durar, horas pequeno, caf□ a meia-noite, comer, nada, fazer caf□ da manh□ beba, □ gua pergunta, o departamento poder compreendo, transmitir, importantes, diagn□ stico entendi, altera□ □ o, dez, ciente que, adaptar, direito, solicitar, telefonando precisar, instru□ □ es, procurar, Servi□ o, esclarecer, d□ vidas 13h N□ o 21/01/2021 11h N□ o N□ o N□ o N□ o

1/18/2021 16:38:43 N□ o SIM, aceito participar. Ed 1971 Sim P□ s-Gradua□ □ o (especializa□ □ o, mestrado e/ou doutorado). Sudeste Casado(a) / Vive junto 02 Masculino Sim Sim Sim 96 169 N□ o Sim, □ s vezes. Sim 1 a 5 anos. N□ o, n□ o tenho nenhuma dessas doen□ as 0 est□ mago raio x, vazio durar, horas pequeno, caf□ a meia-noite, comer, nada, fazer caf□ da manh□ beba, □ gua pergunta, o departamento poder compreendo, transmitir, importantes, diagn□ stico entendi, altera□ □ o, dez, ciente que, adaptar, direito, solicitar, telefonando precisar, instru□ □ es, procurar, Servi□ o, esclarecer, d□ vidas As 13:00 N□ o 21/01/2021 As 11:00 horas Sim Sim N□ o Sim

1/18/2021 18:50:09 N□ o SIM, aceito participar. An Fortaleza Sim Ensino m□ dio completo (colegial). Nordeste Casado(a) / Vive junto 5 Feminino Sim Sim Sim 85 162 N□ o N□ o. N□ o 1 a 5 anos. Doen□ a nos rins 2 est□ mago raio x, vazio durar, horas pequeno, caf□ a meia-noite, comer, nada, fazer caf□ da manh□ beba, □ gua pergunta, o departamento poder compreendo, transmitir, importantes, diagn□ stico entendi, altera□ □ o, dez, ciente que, adaptar, direito, solicitar, telefonando precisar, instru□ □ es, procurar, Servi□ o, esclarecer, d□ vidas 13 horas N□ o 21/01/2021 11 horas N□ o N□ o N□ o N□ o

1/18/2021 19:01:21 N□ o SIM, aceito participar. NS 1963 Sim Ensino superior completo (faculdade/universidade). Sudeste Casado(a) / Vive junto 3 Feminino Sim Sim Sim 64 163 N□ o Sim, □ s vezes. Sim 1 a 5 anos. N□ o, n□ o t

nenhuma dessas doenças 2 est mago raio x, vazio durar, horas pequeno, café a meia-noite, comer, nada, fazer café da manhã beba, sua pergunta, o departamento poder compreendo, transmitir, importantes, diagnóstico entendi, altera o, dez, ciente que, adaptar, direito, solicitar, telefonando precisar, instruções, procurar, Serviço, esclarecer, d vidas 13 horas N o 21/01/2021 12 horas N o N o N o Sim  
1/18/2021 19:28:14 N o SIM, aceito participar. CL 1971 Sim Ensino superior completo (faculdade/universidade). Sudeste Solteiro(a) 2 Masculino Sim Sim Sim 78 170 N o Sim, s vezes. N o Mais de 10 anos. N o, n o tenho nenhuma dessas doenças 0 est mago raio x, vazio olhar, dietas pequeno, café a meia-noite, comer, nada, fazer café da manhã beba, sua pergunta, o departamento poder compreendo, transmitir, importantes, diagnóstico entendi, altera o, dez, ciente que, adaptar, direito, solicitar, telefonando precisar, instruções, procurar, Serviço, esclarecer, d vidas 13 N o 21/01/2021 11 N o N o N o N o  
1/18/2021 20:28:44 N o SIM, aceito participar. RO 1970 Sim Pós-Graduação o (especialização o, mestrado e/ou doutorado). Nordeste Casado(a) / Vive junto 4 Masculino Sim Sim Sim 74 162 N o N o. N o Mais de 10 anos. N o, n o tenho nenhuma dessas doenças 2 est mago raio x, vazio durar, horas pequeno, café a meia-noite, comer, nada, fazer café da manhã beba, sua pergunta, o departamento poder compreendo, transmitir, importantes, diagnóstico entendi, altera o, dez, ciente do que, dispensar, errado, reparar, observando lavar, taxas, relaxar, Tumor, encobrir, p lvis 13 horas N o 21/01/2021 11 horas N o N o Sim N o  
1/18/2021 21:50:41 N o SIM, aceito participar. So 1974 Sim Ensino fundamental completo. Norte Separado(a) / Divorciado(a) 4 Feminino Sim Sim Sim 96 170 N o N o. N o Menos de 1 ano. Diabetes, Outra que n o está entre as opções de resposta 3 est mago raio x, vazio durar, horas pequeno, café a meia-noite, comer, nada, fazer café da manhã beba, sua pergunta, o departamento poder compreendo, transmitir, importantes, diagnóstico entendi, altera o, dez, ciente que, adaptar, direito, solicitar, telefonando precisar, instruções, procurar, Serviço, esclarecer, d vidas 13h N o 21/01/2021 11h Sim Sim N o N o  
1/18/2021 22:12:14 N o SIM, aceito participar. LI 1985 Sim Pós-Graduação o (especialização o, mestrado e/ou doutorado). Sudeste Solteiro(a) 2 Feminino Sim Sim Sim 110 163 N o N o. Sim 5 a 10 anos. N o, n o tenho nenhuma dessas doenças 1 est mago raio x, vazio durar, horas pequeno, café a meia-noite, comer, nada, fazer café da manhã beba, sua pergunta, o departamento poder compreendo, transmitir, importantes, diagnóstico entendi, altera o, dez, ciente que, adaptar, direito, solicitar, telefonando precisar, instruções, procurar, Serviço, esclarecer, d vidas 13 horas N o 21/01/2021 11 horas Sim N o N o N o  
1/19/2021 0:03:59 N o SIM, aceito participar. Ca 1967 Sim Ensino superior completo (faculdade/universidade). Sudeste Casado(a) / Vive junto 2 Feminino N o Sim Sim 119 167 N o N o. Sim 1 a 5 anos. Outra que n o está entre as opções de resposta 2 est mago raio x, vazio durar, horas pequeno, café a meia-noite, comer, nada, fazer café da manhã beba, sua pergunta, o departamento poder compreendo, transmitir, importantes, diagnóstico entendi, altera o, dez, ciente que, adaptar, direito, solicitar, telefonando precisar, instruções, procurar, Serviço, esclarecer, d vidas 13 hs N o 21/01/2021 11 hs N o Sim N o N o  
1/19/2021 0:09:56 N o SIM, aceito participar. JN 1997 Sim Ensino médio completo (colegial). Norte Solteiro(a) 5 Feminino N o Sim Sim 98 172 Sim N o. Sim 1 a 5 anos. N o, n o tenho nenhuma dessas doenças 3 est mago raio x, vazio durar, horas pequeno, café a meia-noite, comer, nada, fazer café da manhã beba, sua pergunta, o departamento poder compreendo, transmitir, importantes, diagnóstico entendi, altera o, dez, ciente que, adaptar, direito, solicitar, telefonando precisar, instruções, procurar, Serviço, esclarecer, d vidas As 14 horas Sim 21/01/2021 As 9 da manhã Sim Sim N o N o  
1/19/2021 8:04:09 N o SIM, aceito participar. Ha 1964 Sim Pós-Graduação o (especialização o, mestrado e/ou doutorado). Sudeste Casado(a) / Vive junto 2 Masculino Sim Sim Sim 99 180 N o N o. N o 1 a 5 anos. Diabetes 3 est mago raio x, vazio durar, horas pequeno, café a meia-noite, comer, nada, fazer café da manhã beba, sua pergunta, o departamento poder compreendo, transmitir, importantes, diagnóstico entendi, altera o, dez, ciente que, adaptar, direito, solicitar, telefonando precisar, instruções, procurar, Serviço, esclarecer, d vidas 13 N o 21/01/2021 11 Sim Sim N o N o  
1/19/2021 17:56:53 N o SIM, aceito participar. Ma 1982 Sim Ensino médio completo (colegial). Sudeste Casado(a) / Vive junto 4 Feminino N o Sim Sim 96 164 N o N o. Sim Mais de 10 anos. Infarto, Doença arterial coronariana (fiz cateterismo nos vasos do coração) 6 pontos raio x, vazio durar, horas pequeno, café a meia-noite, comer, nada, fazer café da manhã beba, sua pergunta, o departamento poder compreendo, transmitir, importantes, diagnóstico entendi, altera o, dez, ciente que, adaptar, direito, solicitar, telefonando precisar, instruções, procurar, Serviço, esclarecer, d vidas 14 horas Sim 21/01/2021 11 Sim Sim N o N o  
1/19/2021 18:14:39 N o SIM, aceito participar. Jo 1966 Sim Ensino fundamental completo. Sudeste Casado(a) / Vive junto 3 Masculino Sim Sim Sim 89 165 N o Sim, s vezes. Sim Mais de 10 anos. Diabetes 1 est mago raio x, vazio durar, horas pequeno, café a meia-noite, comer, nada, fazer café da manhã beba, sua pergunta, o depart



amento poder compreendo, transmitir, importantes, diagnóstico entendi, altera□ □ o, dez, ciente que, adaptar, direito, solicitar, telefonando precisar, instru□ □ es, procurar, Servi□ o, esclarecer, d□ vidas 13 horas N□ o 21/01/2021 11 horas N□ o Sim N□ o N□ o

1/19/2021 21:10:34 N□ o SIM, aceito participar. PA 1965 Sim P□ s-Gradua□ □ o (especializa□ □ o, mestrado e/ou doutorado). Nordeste Solteiro(a) 2 Masculino Sim Sim Sim 84 173 N□ o Sim, frequentemente. Sim 5 a 10 anos. N□ o, n□ o tenho nenhuma dessas doen□ as 4 est□ mago raio x, vazio durar, horas pequeno, caf□ a meia-noite, comer, nada, fazer caf□ da manh□ beba, □ gua pergunta, o departamento poder compreendo, transmitir, importantes, diagnóstico entendi, altera□ □ o, dez, ciente que, adaptar, direito, solicitar, telefonando precisar, instru□ □ es, procurar, Servi□ o, esclarecer, d□ vidas 13 N□ o 21/01/2021 11 N□ o N□ o N□ o Sim

1/19/2021 21:17:51 N□ o SIM, aceito participar. Ca 1984 Sim P□ s-Gradua□ □ o (especializa□ □ o, mestrado e/ou doutorado). Sul Casado(a) / Vive junto 2 Feminino Sim Sim Sim 68 157 N□ o Sim, □ s vezes. N□ o Mais de 10 anos. N□ o, n□ o tenho nenhuma dessas doen□ as 1 est□ mago raio x, vazio durar, horas pequeno, caf□ a meia-noite, comer, nada, fazer caf□ da manh□ beba, □ gua pergunta, o departamento poder compreendo, transmitir, importantes, diagnóstico entendi, altera□ □ o, dez, ciente que, adaptar, direito, solicitar, telefonando precisar, instru□ □ es, procurar, Servi□ o, esclarecer, d□ vidas 13 N□ o 21/01/2021 11 N□ o N□ o N□ o N□ o

1/19/2021 22:46:07 N□ o SIM, aceito participar. Al 1972 Sim Ensino m□ dio completo (colegial). Sudeste Vi□ vo(a) 2 Feminino Sou aposentado(a) / pensionista Sim Sim 140 170 N□ o Sim, □ s vezes. N□ o Mais de 10 anos. N□ o, n□ o tenho nenhuma dessas doen□ as 4 est□ mago raio x, vazio durar, horas pequeno, caf□ a meia-noite, comer, nada, fazer caf□ da manh□ beba, □ gua pergunta, o departamento poder compreendo, transmitir, importantes, diagnóstico entendi, altera□ □ o, dez, ciente que, adaptar, direito, solicitar, telefonando precisar, instru□ □ es, procurar, Servi□ o, esclarecer, d□ vidas 13 N□ o 20/01/2021 11 N□ o N□ o N□ o N□ o

1/19/2021 23:07:17 N□ o SIM, aceito participar. El 1966 Sim Ensino m□ dio completo (colegial). Sul Separado(a) / Divorciado(a) 3 Feminino Sim Sim Sim 80 150 N□ o Sim, □ s vezes. N□ o 1 a 5 anos. N□ o, n□ o tenho nenhuma dessas doen□ as 2 est□ mago raio x, vazio durar, horas pequeno, caf□ a meia-noite, comer, nada, fazer caf□ da manh□ beba, □ gua pergunta, o departamento poder compreendo, transmitir, importantes, diagnóstico entendi, altera□ □ o, dez, ciente que, adaptar, direito, solicitar, telefonando precisar, instru□ □ es, procurar, Servi□ o, esclarecer, d□ vidas 13 horas N□ o 21/01/2021 11 horas Sim Sim N□ o N□ o

1/19/2021 23:54:38 N□ o SIM, aceito participar. Vi 1962 Sim Ensino m□ dio completo (colegial). Sul Separado(a) / Divorciado(a) 1 Feminino N□ o Sim Sim 109 170 N□ o N□ o. N□ o Menos de 1 ano. N□ o, n□ o tenho nenhuma dessas doen□ as 4 pontos raio x, vazio durar, horas pequeno, caf□ a meia-noite, comer, nada, fazer caf□ da manh□ beba, □ gua pergunta, o departamento poder compreendo, transmitir, importantes, diagnóstico entendi, altera□ □ o, dez, ciente que, adaptar, direito, solicitar, telefonando precisar, instru□ □ es, procurar, Servi□ o, esclarecer, d□ vidas 13hrs Sim 19/01/2021 11hrs N□ o N□ o N□ o N□ o

1/20/2021 1:04:55 N□ o SIM, aceito participar. La 1965 Sim P□ s-Gradua□ □ o (especializa□ □ o, mestrado e/ou doutorado). Sudeste Vi□ vo(a) 3 Feminino Sou aposentado(a) / pensionista Sim Sim 66 174 N□ o N□ o. N□ o 1 a 5 anos. N□ o, n□ o tenho nenhuma dessas doen□ as 2 est□ mago raio x, vazio durar, horas pequeno, caf□ a meia-noite, comer, nada, fazer caf□ da manh□ beba, □ gua pergunta, o departamento poder compreendo, transmitir, importantes, diagnóstico entendi, altera□ □ o, dez, ciente que, adaptar, direito, solicitar, telefonando precisar, instru□ □ es, procurar, Servi□ o, esclarecer, d□ vidas 13 horas N□ o 21/01/2021 11 horas N□ o Sim Sim N□ o

1/20/2021 6:04:54 N□ o SIM, aceito participar. ML 1959 Sim Ensino m□ dio completo (colegial). Nordeste Vi□ vo(a) 5 Feminino Sou aposentado(a) / pensionista Sim Sim 70 154 N□ o N□ o. N□ o Mais de 10 anos. Diabetes, Infarto, Outra que n□ o est□ entre as op□ □ es de resposta 8 est□ mago raio x, vazio durar, horas pequeno, caf□ a meia-noite, comer, nada, fazer caf□ da manh□ beba, □ gua pergunta, o departamento poder compreendo, transmitir, importantes, diagnóstico entendi, altera□ □ o, dez, ciente que, adaptar, direito, solicitar, telefonando precisar, instru□ □ es, procurar, Servi□ o, esclarecer, d□ vidas 13 horas Sim 21/01/2021 11 horas Sim Sim Sim Sim

1/20/2021 6:17:31 N□ o SIM, aceito participar. Th 1984 Sim P□ s-Gradua□ □ o (especializa□ □ o, mestrado e/ou doutorado). Sul Casado(a) / Vive junto 2 Masculino Sim Sim Sim 113 185 N□ o Sim, □ s vezes. Sim 1 a 5 anos. N□ o, n□ o tenho nenhuma dessas doen□ as 2 est□ mago raio x, vazio durar, horas pequeno, caf□ a meia-noite, comer, nada, fazer caf□ da manh□ beba, □ gua pergunta, o departamento poder compreendo, transmitir, importantes, diagnóstico entendi, altera□ □ o, dez, ciente que, adaptar, direito, solicitar, telefonando precisar, instru□ □ es, procurar, Servi□ o, esclarecer, d□ vidas 13h N□ o 21/01/2021 11h N□ o N□ o N□ o Sim

1/20/2021 8:45:32 N□ o SIM, aceito participar. Maria Luiza 1960 Sim P□ s-Gradua□ □ o (especializa□ □ o, mestrado e/ou doutorado). Sudeste Vi□ vo(a) 4 Feminino Sim Sim Sim 60 155 N□ o Sim, □ s vezes. N□ o Mais de 10 anos. N□ o, n□ o tenho nenhuma dessas doen□ as 3 est□ mago raio x, vazio durar, horas pequeno, caf□ a meia-noite, comer, nada, fazer caf□ da manh□ beba, □ gua pergunta, o departamento poder compreendo, transmitir, important

es, diagnstico entendi, alterao, dez, ciente que, adaptar, direito, solicitar, telefonando precisar, instrues, p  
rocurar, Servio, esclarecer, dvidas 13 horas No 21/01/2021 11 horas No No No No  
1/20/2021 9:02:46 No SIM, aceito participar. Va 62 Sim Ensino mdio completo (colegial). Centro-Oeste Separa  
do(a) / Divorciado(a) 01 Feminino No Sim Sim 68 163 No No o. No Mais de 10 anos. No, no tenho nen  
huma dessas doenas 6 estmago raio x, vazio durar, horas pequeno, caf a meia-noite, comer, nada, fazer caf  
da manh beba, gua pergunta, o departamento poder compreendo, transmitir, importantes, diagnstico entendi,  
alterao, dez, ciente que, adaptar, direito, solicitar, telefonando precisar, instrues, procurar, Servio, esclar  
ecer, dvidas 13 No 20/01/2021 11 No Sim No No o  
1/20/2021 9:36:51 No SIM, aceito participar. So 1967 Sim Ensino superior completo (faculdade/universidade). Su  
deste Separado(a) / Divorciado(a) 3 Feminino Sim Sim Sim 86 163 No No o. No 5 a 10 anos. Outra que no e  
st entre as opes de resposta 3 estmago raio x, vazio durar, horas pequeno, caf a meia-noite, comer, nada,  
fazer caf da manh beba, gua pergunta, o departamento poder compreendo, transmitir, importantes, diagnsti  
co entendi, alterao, dez, ciente que, adaptar, direito, solicitar, telefonando precisar, instrues, procurar, Servi  
o, esclarecer, dvidas 13 No 21/01/2021 11 No Sim No No o  
1/20/2021 10:33:29 No SIM, aceito participar. DI 1952 Sim Ensino mdio completo (colegial). Sul Casado(a) /  
Vive junto 3 Feminino Sou aposentado(a) / pensionista Sim Sim 78 167 No Sim, s vezes. No 1 a 5 anos. N  
o, no tenho nenhuma dessas doenas 3 estmago raio x, vazio durar, horas pequeno, caf a meia-noite, comer,  
nada, fazer caf da manh beba, gua pergunta, o departamento poder compreendo, transmitir, importantes, diag  
nstico entendi, alterao, dez, ciente que, adaptar, direito, solicitar, telefonando precisar, instrues, procurar  
, Servio, esclarecer, dvidas 13 horas No 21/01/2021 11 horas No No No No  
1/20/2021 12:22:07 No SIM, aceito participar. FI 1980 Sim Ensino mdio completo (colegial). Nordeste Casado(  
a) / Vive junto 4 Feminino Sim Sim Sim 43 162 No Sim, s vezes. No 1 a 5 anos. Outra que no est entre  
as opes de resposta, No, no tenho nenhuma dessas doenas 4 estmago raio x, vazio durar, horas pequen  
o, caf a meia-noite, comer, nada, fazer caf da manh beba, gua pergunta, o departamento poder compreendo  
, transmitir, importantes, diagnstico entendi, alterao, dez, ciente que, adaptar, direito, solicitar, telefonando pr  
ecisar, instrues, procurar, Servio, esclarecer, dvidas 13 horas No 21/01/2021 11 horas No No No  
No o  
1/20/2021 12:50:46 No SIM, aceito participar. El 1965 Sim Ensino superior completo (faculdade/universidade). N  
ordeste Casado(a) / Vive junto 3 Feminino Sim Sim Sim 76 165 No No o. Sim 5 a 10 anos. No, no tenho nen  
huma dessas doenas 1 estmago raio x, vazio durar, horas pequeno, caf a meia-noite, comer, nada, fazer caf  
da manh beba, gua pergunta, o departamento poder compreendo, transmitir, importantes, diagnstico entendi,  
alterao, dez, ciente que, adaptar, direito, solicitar, telefonando precisar, instrues, procurar, Servio, esclar  
ecer, dvidas 19 noite No 20/01/2021 15 horas Sim Sim Sim Sim  
1/20/2021 13:57:40 No SIM, aceito participar. AN 1961 Sim Ensino superior completo (faculdade/universidade).  
Sul Separado(a) / Divorciado(a) 04 Feminino Sim Sim Sim 85 160 No Sim, s vezes. No 1 a 5 anos. No, n  
o tenho nenhuma dessas doenas 01 estmago raio x, vazio durar, horas pequeno, caf a meia-noite, comer, na  
da, fazer caf da manh beba, gua pergunta, o departamento poder compreendo, transmitir, importantes, diagn  
stico entendi, alterao, dez, ciente que, adaptar, direito, solicitar, telefonando precisar, instrues, procurar,  
Servio, esclarecer, dvidas 13 horas No 21/01/2021 11 horas No No No No o  
1/20/2021 14:07:23 No SIM, aceito participar. Vi 1961 Sim Ps-Graduao (especializao, mestrado e/ou  
doutorado). Sudeste Separado(a) / Divorciado(a) 3 Feminino Sim Sim Sim 97 155 No Sim, s vezes. No Men  
os de 1 ano. No, no tenho nenhuma dessas doenas 4 estmago raio x, vazio durar, horas pequeno, caf a me  
ia-noite, comer, nada, fazer caf da manh beba, gua pergunta, o departamento poder compreendo, transmitir,  
importantes, diagnstico entendi, alterao, dez, ciente que, adaptar, direito, solicitar, telefonando precisar, instr  
ues, procurar, Servio, esclarecer, dvidas 13hs No 21/01/2021 11hs No Sim Sim Sim  
1/20/2021 16:23:05 No SIM, aceito participar. RO 1973 Sim Ps-Graduao (especializao, mestrado e/o  
u doutorado). Sudeste Vivo(a) 2 Feminino Sim Sim Sim 100 155 No Sim, s vezes. No Mais de 10 anos. N  
o, no tenho nenhuma dessas doenas 3 estmago raio x, vazio durar, horas pequeno, caf a meia-noite, com  
er, nada, fazer caf da manh beba, gua pergunta, o departamento poder compreendo, transmitir, importantes, d  
iagnstico entendi, alterao, dez, ciente que, adaptar, direito, solicitar, telefonando precisar, instrues, procu  
rar, Servio, esclarecer, dvidas 13 No 21/01/2021 11 Sim Sim No No o  
1/20/2021 18:28:29 No SIM, aceito participar. Jo 1960 Sim Ensino mdio completo (colegial). Sudeste Casado(a  
) / Vive junto 4 Masculino Sou aposentado(a) / pensionista Sim Sim 100 185 No Sim, s vezes. No Mais de 10  
anos. AVC (derrame), Doena arterial coronariana (fiz cateterismo nos vasos do corao) 4 estmago raio x, v  
azio durar, horas pequeno, caf a meia-noite, comer, nada, fazer caf da manh beba, gua pergunta, o departa

mento poder compreendo, transmitir, importantes, diagnóstico entendi, altera□ □ o, dez, ciente que, adaptar, direito, solicitar, telefonando precisar, instru□ □ es, procurar, Servi□ o, esclarecer, d□ vidas 13 horas N□ o 21/01/2021 11 horas N□ o Sim N□ o N□ o

1/20/2021 19:58:21 N□ o SIM, aceito participar. Jo 1963 Sim Ensino fundamental completo. Sudeste Casado(a) / Vive junto 3 Feminino Sou aposentado(a) / pensionista Sim Sim 115 160 N□ o N□ o. N□ o Mais de 10 anos. Diabetes, Doen□ a arterial coronariana (fiz cateterismo nos vasos do cora□ □ o) 15 est□ mago raio x, vazio durar, horas pequeno, caf□ a meia-noite, comer, nada, fazer caf□ da manh□ beba, □ gua pergunta, o departamento poder compreendo, transmitir, importantes, diagnóstico entendi, altera□ □ o, dez, ciente que, adaptar, direito, solicitar, telefonando precisar, instru□ □ es, procurar, Servi□ o, esclarecer, d□ vidas 13 Sim 10/06/2021 11 N□ o N□ o N□ o Sim

1/20/2021 21:40:22 N□ o SIM, aceito participar. AN 1965 Sim P□ s-Gradua□ □ o (especializa□ □ o, mestrado e/ou doutorado). Nordeste Separado(a) / Divorciado(a) 3 Feminino Sim Sim Sim 85 158 N□ o N□ o. N□ o Mais de 10 anos. Diabetes 4 est□ mago raio x, vazio durar, horas pequeno, caf□ a meia-noite, comer, nada, fazer caf□ da manh□ beba, □ gua pergunta, o departamento poder compreendo, transmitir, importantes, diagnóstico entendi, altera□ □ o, dez, ciente que, adaptar, direito, solicitar, telefonando precisar, instru□ □ es, procurar, Servi□ o, esclarecer, d□ vidas 13 horas N□ o 21/01/2021 11 horas N□ o N□ o N□ o N□ o

1/20/2021 21:41:53 N□ o SIM, aceito participar. FA 1957 Sim Ensino m□ dio completo (colegial). Sudeste Casado(a) / Vive junto 2 Feminino N□ o Sim Sim 80 165 N□ o Sim, □ s vezes. Sim Mais de 10 anos. Outra que n□ o est□ entre as op□ □ es de resposta 10 est□ mago raio x, vazio durar, horas pequeno, caf□ a meia-noite, comer, nada, fazer caf□ da manh□ beba, □ gua pergunta, o departamento poder compreendo, transmitir, importantes, diagnóstico entendi, altera□ □ o, dez, ciente do que, dispensar, errado, reparar, observando precisar, instru□ □ es, procurar, Servi□ o, esclarecer, d□ vidas 13 horas N□ o 21/01/2021 11 horas N□ o N□ o N□ o N□ o

1/21/2021 6:29:28 N□ o SIM, aceito participar. Ja 1964 Sim P□ s-Gradua□ □ o (especializa□ □ o, mestrado e/ou doutorado). Sul Casado(a) / Vive junto 3 Feminino Sim Sim Sim 80 160 N□ o Sim, □ s vezes. Sim Mais de 10 anos. Doen□ a arterial coronariana (fiz cateterismo nos vasos do cora□ □ o), Outra que n□ o est□ entre as op□ □ es de resposta 6 est□ mago raio x, vazio durar, horas pequeno, caf□ a meia-noite, comer, nada, fazer caf□ da manh□ beba, □ gua pergunta, o departamento poder compreendo, transmitir, importantes, diagnóstico entendi, altera□ □ o, dez, ciente que, adaptar, direito, solicitar, telefonando precisar, instru□ □ es, procurar, Servi□ o, esclarecer, d□ vidas 13 N□ o 21/01/2021 11 N□ o N□ o N□ o N□ o

1/21/2021 6:33:15 N□ o SIM, aceito participar. TA 1969 Sim Ensino m□ dio completo (colegial). Sudeste Solteiro(a) 1 Feminino Sim Sim Sim 89 174 N□ o N□ o. N□ o Mais de 10 anos. Diabetes, Infarto, Doen□ a arterial coronariana (fiz cateterismo nos vasos do cora□ □ o) 8 pontos raio x, vazio durar, horas pequeno, caf□ a meia-noite, comer, nada, fazer caf□ da manh□ beba, □ gua pergunta, o departamento poder compreendo, transmitir, importantes, diagnóstico entendi, altera□ □ o, dez, ciente que, adaptar, direito, solicitar, telefonando precisar, instru□ □ es, procurar, Servi□ o, esclarecer, d□ vidas 13 N□ o 21/01/2021 11 Sim Sim N□ o N□ o

1/21/2021 6:49:47 N□ o SIM, aceito participar. Sa 1958 Sim Ensino m□ dio completo (colegial). Sudeste Casado(a) / Vive junto 3 Feminino Sou aposentado(a) / pensionista Sim Sim 45 150 Sim Sim, □ s vezes. N□ o Mais de 10 anos. N□ o, n□ o tenho nenhuma dessas doen□ as 2 est□ mago raio x, vazio durar, horas pequeno, caf□ a meia-noite, comer, nada, fazer caf□ da manh□ beba, □ gua pergunta, o departamento poder compreendo, transmitir, importantes, diagnóstico entendi, altera□ □ o, dez, ciente que, adaptar, direito, solicitar, telefonando precisar, instru□ □ es, procurar, Servi□ o, esclarecer, d□ vidas 13 Sim 21/01/2021 11 Sim N□ o N□ o Sim

1/21/2021 10:53:24 N□ o SIM, aceito participar. Si 1965 Sim Ensino superior completo (faculdade/universidade). Sudeste Solteiro(a) 2 Feminino Sim Sim Sim 54 160 N□ o Sim, □ s vezes. Sim 5 a 10 anos. N□ o, n□ o tenho nenhuma dessas doen□ as 0 est□ mago raio x, vazio durar, horas pequeno, caf□ a meia-noite, comer, nada, fazer caf□ da manh□ beba, □ gua pergunta, o departamento poder compreendo, transmitir, importantes, diagnóstico entendi, altera□ □ o, dez, ciente que, adaptar, direito, solicitar, telefonando precisar, instru□ □ es, procurar, Servi□ o, esclarecer, d□ vidas 13 hs N□ o 28/01/2021 11 hs Sim N□ o N□ o N□ o

1/21/2021 14:16:27 N□ o SIM, aceito participar. Su 1968 Sim P□ s-Gradua□ □ o (especializa□ □ o, mestrado e/ou doutorado). Nordeste Solteiro(a) 4 Feminino N□ o Sim Sim 85 154 N□ o N□ o. N□ o 5 a 10 anos. N□ o, n□ o tenho nenhuma dessas doen□ as 1 est□ mago raio x, vazio durar, horas pequeno, caf□ a meia-noite, comer, nada, fazer caf□ da manh□ beba, □ gua pergunta, o departamento poder compreendo, transmitir, importantes, diagnóstico entendi, altera□ □ o, dez, ciente que, adaptar, direito, solicitar, telefonando precisar, instru□ □ es, procurar, Servi□ o, esclarecer, d□ vidas 13h N□ o 28/01/2021 6h Sim Sim Sim Sim

1/21/2021 14:18:47 N□ o SIM, aceito participar. Ma 66 Sim Ensino fundamental completo. Nordeste Solteiro(a) 5 Feminino N□ o Sim Sim 59 153 N□ o N□ o. N□ o Mais de 10 anos. Diabetes 2 est□ mago dormir, anemia olhar, dietas pensamento, n□ usea antes, pedir, algum, estar caf□ da manh□ beba, □ gua pergunta, o departamento doer com

preendo, transmitir, importantes, diagnóstico estico entretenho, anti-cido, um, longe do que, dispensar, errado, reparar, observando precisar, instruções, procurar, Serviço, esclarecer, datas 1 da manhã N o 21/01/2021 11 Sim N o N o N o

1/21/2021 14:56:59 N o SIM, aceito participar. Ja 1967 Sim Ensino médio completo (colegial). Nordeste Solteiro (a) 2 Feminino N o Sim Sim 120 163 N o Sim, às vezes. N o 5 a 10 anos. N o, n o tenho nenhuma dessas doenças 3 estomago raio x, vazio durar, horas pequeno, café a meia-noite, comer, nada, fazer café da manhã beba, sua pergunta, o departamento poder compreendo, transmitir, importantes, diagnóstico estico entendi, altera o, dez, ciente que, adaptar, direito, solicitar, telefonando precisar, instruções, procurar, Serviço, esclarecer, datas 13h N o 04/02/2021 11h N o N o N o N o

1/21/2021 17:02:55 N o SIM, aceito participar. CL 1964 Sim Ensino superior completo (faculdade/universidade). Sudeste Separado(a) / Divorciado(a) 3 Masculino Sou aposentado(a) / pensionista Sim Sim 120 170 N o Sim, frequentemente. Sim 5 a 10 anos. N o, n o tenho nenhuma dessas doenças 5 pontos raio x, vazio durar, horas pequeno, café a meia-noite, comer, nada, fazer café da manhã beba, sua pergunta, o departamento poder compreendo, transmitir, importantes, diagnóstico estico entendi, altera o, dez, ciente que, adaptar, direito, solicitar, telefonando precisar, instruções, procurar, Serviço, esclarecer, datas 13 N o 28/01/2021 11 Sim Sim N o N o

1/21/2021 18:36:54 N o SIM, aceito participar. Ad 1963 Sim Ensino médio completo (colegial). Nordeste Casado (a) / Vive junto 2 Masculino Sim Sim Sim 106 170 N o Sim, às vezes. Sim Mais de 10 anos. N o, n o tenho nenhuma dessas doenças 1 estomago raio x, vazio durar, horas pequeno, café a meia-noite, comer, nada, fazer café da manhã beba, sua pergunta, o departamento poder compreendo, transmitir, importantes, diagnóstico estico entendi, altera o, dez, ciente que, adaptar, direito, solicitar, telefonando precisar, instruções, procurar, Serviço, esclarecer, datas 13 horas N o 21/01/2021 11 horas Sim Sim Sim N o

1/21/2021 18:41:19 N o SIM, aceito participar. CI 1972 Sim Ensino superior completo (faculdade/universidade). Sudeste Viúvo(a) 3 Feminino N o Sim Sim 67 156 N o Sim, às vezes. Sim 5 a 10 anos. N o, n o tenho nenhuma dessas doenças 2 estomago raio x, vazio durar, horas pequeno, café a meia-noite, comer, nada, fazer café da manhã beba, sua pergunta, o departamento poder compreendo, transmitir, importantes, diagnóstico estico entendi, altera o, dez, ciente que, adaptar, direito, solicitar, telefonando precisar, instruções, procurar, Serviço, esclarecer, datas 13hs N o 21/01/2021 11hs Sim Sim N o N o

1/21/2021 19:29:36 N o SIM, aceito participar. He 1954 Sim Ensino fundamental completo. Sudeste Viúvo(a) 2 Masculino Sou aposentado(a) / pensionista Sim Sim 65 178 N o Sim, às vezes. N o 5 a 10 anos. Diabetes 4 estomago raio x, vazio durar, horas pequeno, café a meia-noite, comer, nada, fazer café da manhã beba, sua pergunta, o departamento poder compreendo, transmitir, importantes, diagnóstico estico entendi, altera o, dez, ciente que, adaptar, direito, solicitar, telefonando precisar, instruções, procurar, Serviço, esclarecer, datas 13 N o 21/01/2021 11 Sim Sim N o Sim

1/21/2021 20:12:49 N o SIM, aceito participar. AN 1969 Sim Pós-Graduação (especialização, mestrado e/ou doutorado). Norte Casado(a) / Vive junto 4 Feminino Sim Sim Sim 60 152 N o N o. Sim 5 a 10 anos. N o, n o tenho nenhuma dessas doenças 5 estomago raio x, vazio durar, horas pequeno, café a meia-noite, comer, nada, fazer café da manhã beba, sua pergunta, o departamento poder compreendo, transmitir, importantes, diagnóstico estico entendi, altera o, dez, ciente que, adaptar, direito, solicitar, telefonando precisar, instruções, procurar, Serviço, esclarecer, datas 13h N o 21/01/2021 11h N o Sim N o N o

1/21/2021 20:47:01 N o SIM, aceito participar. Na 1967 Sim Ensino médio completo (colegial). Sudeste Casado(a) / Vive junto 2 Feminino Sou aposentado(a) / pensionista Sim Sim 76 167 N o Sim, às vezes. N o Mais de 10 anos. N o, n o tenho nenhuma dessas doenças 4 estomago raio x, vazio durar, horas pequeno, café a meia-noite, comer, nada, fazer café da manhã beba, sua pergunta, o departamento poder compreendo, transmitir, importantes, diagnóstico estico entendi, altera o, dez, ciente que, adaptar, direito, solicitar, telefonando precisar, instruções, procurar, Serviço, esclarecer, datas 13 N o 28/01/2021 11 N o N o N o N o

1/21/2021 21:19:41 N o SIM, aceito participar. An 67 Sim Ensino médio completo (colegial). Sudeste Solteiro(a) 1 Feminino Sou aposentado(a) / pensionista Sim Sim 75 161 N o N o. Sim 5 a 10 anos. Diabetes 3 diabetes raio x, vazio durar, horas pequeno, café a meia-noite, comer, nada, fazer café da manhã beba, sua pergunta, o departamento poder compreendo, transmitir, importantes, diagnóstico estico entendi, altera o, dez, ciente que, adaptar, direito, solicitar, telefonando precisar, instruções, procurar, Serviço, esclarecer, datas 14 Sim 22/02/2021 11 N o N o N o N o

1/21/2021 21:56:00 N o SIM, aceito participar. Ya 1961 Sim Pós-Graduação (especialização, mestrado e/ou doutorado). Sudeste Casado(a) / Vive junto 2 Feminino N o Sim Sim 85 170 N o Sim, às vezes. Sim 5 a 10 anos. Diabetes 3 pontos raio x, vazio durar, horas pequeno, café a meia-noite, comer, nada, fazer café da manhã beba, sua pergunta, o departamento poder compreendo, transmitir, importantes, diagnóstico estico entendi, altera o, de

z, ciente que, adaptar, direito, solicitar, telefonando precisar, instruções, procurar, Serviço, esclarecer, dividas 13 N 21/01/2021 11 N 0 N 0 N 0

1/21/2021 22:03:23 N 0 SIM, aceito participar. HU 1988 Sim Pós-Graduação (especialização, mestrado e/ou doutorado). Nordeste Solteiro(a) 4 Feminino Sim Sim Sim 76 163 N 0 N 0. N 0 1 a 5 anos. N 0, n 0 tenho nenhuma dessas doenças 6 est 0 mago raio x, vazio durar, horas pequeno, café a meia-noite, comer, nada, fazer café da manhã beba, 0 gua pergunta, o departamento poder compreendo, transmitir, importantes, diagnóstico entendi, altera 0 0, dez, ciente que, adaptar, direito, solicitar, telefonando precisar, instruções, procurar, Serviço, esclarecer, dividas 13 N 0 28/01/2021 11 N 0 Sim N 0 N 0

1/21/2021 23:04:45 N 0 SIM, aceito participar. Fl 1958 Sim Ensino superior completo (faculdade/universidade). Sul Solteiro(a) 4 Feminino Sou aposentado(a) / pensionista Sim Sim 80 170 N 0 N 0. N 0 Mais de 10 anos. Outra que n 0 est 0 entre as opções de resposta 4 est 0 mago raio x, vazio durar, horas pequeno, café a meia-noite, comer, nada, fazer café da manhã beba, 0 gua pergunta, o departamento poder compreendo, transmitir, importantes, diagnóstico entendi, altera 0 0, dez, ciente que, adaptar, direito, solicitar, telefonando precisar, instruções, p

rocurar, Serviço, esclarecer, dividas 13 horas N 0 28/01/2021 11 horas N 0 N 0 N 0 Sim  
1/21/2021 23:45:25 N 0 SIM, aceito participar. RO 1976 Sim Ensino médio completo (colegial). Sudeste Casado(a) / Vive junto 5 Feminino Sim Sim Sim 139 139 N 0 Sim, 0 s vezes. N 0 1 a 5 anos. Outra que n 0 est 0 entre as opções de resposta 10 pontos raio x, vazio durar, horas pequeno, café a meia-noite, comer, nada, fazer café da manhã beba, 0 gua pergunta, o departamento poder compreendo, transmitir, importantes, diagnóstico entendi, altera 0 0, dez, ciente que, adaptar, direito, solicitar, telefonando precisar, instruções, procurar, Serviço, esclarecer, dividas 13 horas Sim 21/01/2021 11 horas N 0 N 0 N 0 Sim

1/22/2021 1:55:34 N 0 SIM, aceito participar. Si 1971 Sim Ensino médio completo (colegial). Sudeste Vi 0 vo(a) 3 Feminino Sim Sim Sim 100 158 Sim Sim, frequentemente. N 0 Mais de 10 anos. Outra que n 0 est 0 entre as opções de resposta 5 est 0 mago raio x, vazio durar, horas pequeno, café a meia-noite, comer, nada, fazer café da manhã beba, 0 gua pergunta, o departamento poder compreendo, transmitir, importantes, diagnóstico entendi, altera 0 0, dez, ciente que, adaptar, direito, solicitar, telefonando precisar, instruções, procurar, Serviço, esclarecer, dividas 13 N 0 28/01/2021 12 Sim Sim Sim Sim

1/22/2021 2:28:39 N 0 SIM, aceito participar. MA 1980 Sim Ensino superior completo (faculdade/universidade). Centro-Oeste Solteiro(a) 2 Feminino N 0 Sim Sim 100 150 N 0 Sim, frequentemente. N 0 Mais de 10 anos. N 0, n 0 tenho nenhuma dessas doenças 4 est 0 mago raio x, vazio durar, horas pequeno, café a meia-noite, comer, nada, fazer café da manhã beba, 0 gua pergunta, o departamento poder compreendo, transmitir, importantes, diagnóstico entendi, altera 0 0, dez, ciente que, adaptar, direito, solicitar, telefonando precisar, instruções, procurar, Serviço, esclarecer, dividas 13:00 N 0 28/01/2021 11:00 Sim Sim N 0 N 0

1/22/2021 6:09:46 N 0 SIM, aceito participar. Jo 1965 Sim Pós-Graduação (especialização, mestrado e/ou doutorado). Nordeste Casado(a) / Vive junto 3 Feminino Sim Sim Sim 73 165 N 0 N 0. N 0 5 a 10 anos. N 0, n 0 tenho nenhuma dessas doenças 2 est 0 mago raio x, vazio durar, horas pequeno, café a meia-noite, comer, nada, fazer café da manhã beba, 0 gua pergunta, o departamento poder compreendo, transmitir, importantes, diagnóstico entendi, altera 0 0, dez, ciente que, adaptar, direito, solicitar, telefonando precisar, instruções, procurar, Serviço, esclarecer, dividas 13 horas N 0 25/02/2021 11 horas N 0 N 0 N 0 Sim

1/22/2021 6:51:58 N 0 SIM, aceito participar. Va 1968 Sim Ensino médio completo (colegial). Nordeste Separado(a) / Divorciado(a) 3 Feminino N 0 Sim Sim 85 172 N 0 Sim, 0 s vezes. N 0 Mais de 10 anos. N 0, n 0 tenho nenhuma dessas doenças 4 est 0 mago raio x, vazio durar, horas pequeno, café a meia-noite, comer, nada, fazer café da manhã beba, 0 gua pergunta, o departamento poder compreendo, transmitir, importantes, diagnóstico entendi, altera 0 0, dez, ciente que, adaptar, direito, solicitar, telefonando precisar, instruções, procurar, Serviço, esclarecer, dividas 13hrs N 0 28/01/2021 11hrs Sim Sim N 0 Sim

1/22/2021 8:03:42 N 0 SIM, aceito participar. MS 1978 Sim Ensino fundamental completo. Sul Separado(a) / Divorciado(a) 4 Feminino N 0 Sim Sim 73 162 Sim Sim, 0 s vezes. N 0 1 a 5 anos. N 0, n 0 tenho nenhuma dessas doenças 2 est 0 mago raio x, vazio durar, horas pequeno, café a meia-noite, comer, nada, fazer café da manhã beba, 0 gua pergunta, o departamento poder compreendo, transmitir, importantes, diagnóstico entendi, altera 0 0, dez, ciente que, adaptar, direito, solicitar, telefonando precisar, instruções, procurar, Serviço, esclarecer, dividas 13h N 0 27/01/2021 11 Sim Sim Sim N 0

1/22/2021 13:30:51 N 0 SIM, aceito participar. Jo 1954 Sim Ensino superior completo (faculdade/universidade). Sul Casado(a) / Vive junto 2 Masculino Sou aposentado(a) / pensionista Sim Sim 110 174 Sim Sim, 0 s vezes. Sim 1 a 5 anos. N 0, n 0 tenho nenhuma dessas doenças 5 est 0 mago raio x, vazio durar, horas pequeno, café a meia-noite, comer, nada, fazer café da manhã beba, 0 gua pergunta, o departamento poder compreendo, transmitir, importantes, diagnóstico entendi, altera 0 0, dez, ciente que, adaptar, direito, solicitar, telefonando precisar, instruções

es, procurar, Servir, esclarecer, dvidas 13:00 N o 28/01/2021 09:00 N o N o N o N o  
1/22/2021 14:17:15 N o SIM, aceito participar. AL 2000 Sim Ensino m dio completo (colegial). Sudeste Casado(a) / Vive junto 2 Feminino N o Sim Sim 86 157 N o Sim, s vezes. N o 1 a 5 anos. N o, n o tenho nenhuma dessas doen as 5 est mago raio x, vazio durar, horas pequeno, caf a meia-noite, comer, nada, fazer caf da manh beba, gua pergunta, o departamento poder compreendo, transmitir, importantes, diagn stico entendi, altera o, dez, ciente que, adaptar, direito, solicitar, telefonando precisar, instru es, procurar, Servir, esclarecer, dvidas 13h N o 28/01/2021 11h Sim Sim Sim N o

1/22/2021 14:41:04 N o SIM, aceito participar. SO 1955 Sim Ensino m dio completo (colegial). Sudeste Casado(a) / Vive junto 1 Feminino N o Sim Sim 95 165 N o N o. Sim Mais de 10 anos. N o, n o tenho nenhuma dessas doen as 4 est mago raio x, vazio durar, horas pequeno, caf a meia-noite, comer, nada, fazer caf da manh beba, gua pergunta, o departamento poder compreendo, transmitir, importantes, diagn stico entendi, altera o, dez, ciente que, adaptar, direito, solicitar, telefonando precisar, instru es, procurar, Servir, esclarecer, dvidas 13 hs N o 28/01/2021 11 hs Sim N o N o N o

1/22/2021 14:43:48 N o SIM, aceito participar. HL 1977 Sim Ensino m dio completo (colegial). Norte Casado(a) / Vive junto 2 Feminino N o Sim Sim 110 164 N o Sim, s vezes. N o Menos de 1 ano. N o, n o tenho nenhuma dessas doen as 2 est mago raio x, vazio durar, horas pequeno, caf a meia-noite, comer, nada, fazer caf da manh beba, gua pergunta, o departamento poder compreendo, transmitir, importantes, diagn stico entendi, altera o, dez, ciente que, adaptar, direito, solicitar, telefonando precisar, instru es, procurar, Servir, esclarecer, dvidas 13 Sim 28/01/2021 11 N o N o Sim Sim

1/22/2021 16:19:29 N o SIM, aceito participar. IS 1970 Sim P s-Gradua o (especializa o, mestrado e/ou doutorado). Nordeste Separado(a) / Divorciado(a) 5 Feminino Sim Sim Sim 52 160 N o N o. N o 5 a 10 anos. Diabetes, Outra que n o est entre as op es de resposta 3 est mago raio x, vazio durar, horas pequeno, caf a meia-noite, comer, nada, fazer caf da manh beba, gua pergunta, o departamento poder compreendo, transmitir, importantes, diagn stico entendi, altera o, dez, ciente que, adaptar, direito, solicitar, telefonando precisar, instru es, procurar, Servir, esclarecer, dvidas 13h N o 28/01/2021 11h N o N o N o N o

1/22/2021 20:20:01 N o SIM, aceito participar. MA 1972 Sim Ensino superior completo (faculdade/universidade). Sudeste Vi vo(a) 2 Feminino Sim Sim Sim 71 155 N o N o. Sim Menos de 1 ano. Outra que n o est entre as op es de resposta 1 est mago raio x, vazio durar, horas pequeno, caf a meia-noite, comer, nada, fazer caf da manh beba, gua pergunta, o departamento poder compreendo, transmitir, importantes, diagn stico entendi, altera o, dez, ciente que, adaptar, direito, solicitar, telefonando precisar, instru es, procurar, Servir, esclarecer, dvidas 13 N o 28/01/2021 11 N o N o N o N o

1/22/2021 20:46:04 N o SIM, aceito participar. Lu 1970 Sim Ensino m dio completo (colegial). Sudeste Solteiro(a) 1 Feminino N o Sim Sim 80 163 N o Sim, s vezes. N o Mais de 10 anos. Diabetes 3 est mago raio x, vazio durar, horas pequeno, caf a meia-noite, comer, nada, fazer caf da manh beba, gua pergunta, o departamento poder compreendo, transmitir, importantes, diagn stico entendi, altera o, dez, ciente que, adaptar, direito, solicitar, telefonando precisar, instru es, procurar, Servir, esclarecer, dvidas 13 N o 01/05/2021 11 N o N o N o N o

1/22/2021 21:43:02 N o SIM, aceito participar. Fa 79 Sim Ensino fundamental completo. Sul Casado(a) / Vive junto 3 Feminino N o Sim Sim 120 159 N o N o. Sim 5 a 10 anos. N o, n o tenho nenhuma dessas doen as 5 est mago raio x, vazio durar, horas pequeno, caf a meia-noite, comer, nada, fazer caf da manh beba, gua pergunta, o departamento poder compreendo, transmitir, importantes, diagn stico entendi, altera o, dez, ciente que, adaptar, direito, solicitar, telefonando precisar, instru es, procurar, Servir, esclarecer, dvidas 13:00 N o 21/01/2021 11:00 Sim Sim N o N o

1/22/2021 22:20:59 N o SIM, aceito participar. Vi 1979 Sim Ensino m dio completo (colegial). Sudeste Casado(a) / Vive junto 3 Feminino Sou aposentado(a) / pensionista Sim Sim 98.5 160 N o Sim, s vezes. N o Mais de 10 anos. Diabetes, Infarto, Outra que n o est entre as op es de resposta 6 est mago raio x, vazio durar, horas pequeno, caf a meia-noite, comer, nada, fazer caf da manh beba, gua pergunta, o departamento poder compreendo, transmitir, importantes, diagn stico entendi, altera o, dez, ciente que, adaptar, direito, solicitar, telefonando precisar, instru es, procurar, Servir, esclarecer, dvidas 13h. N o 28/01/2021 11h ou 15h. Sim Sim Sim Sim

1/22/2021 23:13:03 N o SIM, aceito participar. Sh 1979 Sim Ensino m dio completo (colegial). Nordeste Casado(a) / Vive junto 5 Feminino N o Sim Sim 66 160 N o N o. N o 1 a 5 anos. N o, n o tenho nenhuma dessas doen as 0 est mago raio x, vazio durar, horas pequeno, caf a meia-noite, comer, nada, fazer caf da manh beba, gua pergunta, o departamento poder compreendo, transmitir, importantes, diagn stico entendi, altera o, dez, ciente que, adaptar, direito, solicitar, telefonando precisar, instru es, procurar, Servir, esclarecer, dvida

s 13 horas N o 25/01/2021 11 N o Sim Sim Sim

1/23/2021 0:11:22 N o SIM, aceito participar. SA 19/06/1987 Sim P s-Gradua o (especializa o, mestrado e/ou doutorado). Sul Solteiro(a) 2 Masculino Sim Sim Sim 90 170 N o N o. Sim Menos de 1 ano. N o, n o tenho nenhuma dessas doen as 0 est mago raio x, vazio durar, horas pequeno, caf a meia-noite, comer, nada, fazer caf da manh beba, gua pergunta, o departamento poder compreendo, transmitir, importantes, diagn stico entendi, altera o, dez, ciente que, adaptar, direito, solicitar, telefonando precisar, instru es, procurar, Servi o, esclarecer, d vidas 13 N o 28/01/2021 11 horas N o N o N o N o

1/23/2021 0:13:40 N o SIM, aceito participar. AN 1970 Sim Ensino superior completo (faculdade/universidade). Sudeste Solteiro(a) 3 Feminino N o Sim Sim 75 160 N o N o. N o 5 a 10 anos. Outra que n o est entre as op es de resposta 4 est mago raio x, vazio durar, horas pequeno, caf a meia-noite, comer, nada, fazer caf da manh beba, gua pergunta, o departamento poder compreendo, transmitir, importantes, diagn stico entendi, altera o, dez, ciente que, adaptar, direito, solicitar, telefonando precisar, instru es, procurar, Servi o, esclarecer, d vidas 15 h Sim 29/01/2021 11h N o N o N o Sim

1/23/2021 0:24:14 N o SIM, aceito participar. Ro 1963 Sim Ensino superior completo (faculdade/universidade). Sul Solteiro(a) 3 Feminino N o Sim Sim 85 163 N o N o. N o 1 a 5 anos. N o, n o tenho nenhuma dessas doen as 2 est mago raio x, vazio durar, horas pequeno, caf a meia-noite, comer, nada, fazer caf da manh beba, gua pergunta, o departamento poder compreendo, transmitir, importantes, diagn stico entendi, altera o, dez, ciente que, adaptar, direito, solicitar, telefonando precisar, instru es, procurar, Servi o, esclarecer, d vidas 19h N o 28/01/2021 11h N o N o N o N o

1/23/2021 0:42:19 N o SIM, aceito participar. Mi 1982 Sim Ensino m dio completo (colegial). Sudeste Casado(a) / Vive junto 2 Feminino N o Sim Sim 100 170 N o N o. N o 5 a 10 anos. Diabetes, Outra que n o est entre as op es de resposta 5 pontos raio x, vazio durar, horas pequeno, caf a meia-noite, comer, nada, fazer caf da manh beba, gua pergunta, o departamento poder compreendo, transmitir, importantes, diagn stico entendi, altera o, dez, ciente que, adaptar, direito, solicitar, telefonando precisar, instru es, procurar, Servi o, esclarecer, d vidas 13 horas N o 28/01/2021 9 Sim Sim N o N o

1/23/2021 0:50:46 N o SIM, aceito participar. Pa 1966 Sim P s-Gradua o (especializa o, mestrado e/ou doutorado). Sudeste Casado(a) / Vive junto 4 Feminino Sim Sim Sim 76 167 N o Sim, s vezes. N o Mais de 10 anos. Diabetes 2 est mago raio x, vazio durar, horas pequeno, caf a meia-noite, comer, nada, fazer caf da manh beba, gua pergunta, o departamento poder compreendo, transmitir, importantes, diagn stico entendi, altera o, dez, ciente que, adaptar, direito, solicitar, telefonando precisar, instru es, procurar, Servi o, esclarecer, d vidas 13h? N o 28/01/2021 11h Sim Sim N o Sim

1/23/2021 7:59:37 N o SIM, aceito participar. Ro 1972 Sim Ensino m dio completo (colegial). Sudeste Separado(a) / Divorciado(a) 3 Feminino Sim Sim Sim 81 170 N o Sim, s vezes. Sim Mais de 10 anos. Outra que n o est entre as op es de resposta 1 est mago raio x, vazio durar, horas pequeno, caf a meia-noite, comer, nada, fazer caf da manh beba, gua pergunta, o departamento poder compreendo, transmitir, importantes, diagn stico entendi, altera o, dez, ciente que, adaptar, direito, solicitar, telefonando precisar, instru es, procurar, Servi o, esclarecer, d vidas 13 Sim 28/01/2021 1130 N o N o N o Sim

1/23/2021 12:40:24 N o SIM, aceito participar. So 1965 Sim Ensino superior completo (faculdade/universidade). Sul Separado(a) / Divorciado(a) 2 Feminino Sou aposentado(a) / pensionista Sim Sim 98 170 N o N o. Sim Mais de 10 anos. Diabetes 4 pontos raio x, vazio durar, horas pequeno, caf a meia-noite, comer, nada, fazer caf da manh beba, gua pergunta, o departamento poder compreendo, transmitir, importantes, diagn stico entendi, altera o, dez, ciente que, adaptar, direito, solicitar, telefonando precisar, instru es, procurar, Servi o, esclarecer, d vidas 13 horas N o 28/01/2021 11 horas N o N o N o N o

1/23/2021 13:48:46 N o SIM, aceito participar. MA 1980 Sim P s-Gradua o (especializa o, mestrado e/ou doutorado). Nordeste Solteiro(a) 2 Masculino Sim Sim Sim 103 175 N o Sim, s vezes. Sim 5 a 10 anos. Diabetes, Doen a arterial coronariana (fiz cateterismo nos vasos do cora o) 7 pontos raio x, vazio durar, horas pequeno, caf a meia-noite, comer, nada, fazer caf da manh beba, gua pergunta, o departamento poder compreendo, transmitir, importantes, diagn stico entendi, altera o, dez, ciente assim, alimentar, brilho, reciclar, contando precisar, instru es, procurar, Servi o, esclarecer, d vidas 13 N o 28/01/2021 11 Sim Sim N o Sim

1/23/2021 14:06:42 N o SIM, aceito participar. Ad 1971 Sim P s-Gradua o (especializa o, mestrado e/ou doutorado). Norte Separado(a) / Divorciado(a) 2 Feminino N o Sim Sim 76 157 N o Sim, s vezes. Sim 5 a 10 anos. N o, n o tenho nenhuma dessas doen as 4 est mago raio x, vazio durar, horas pequeno, caf a meia-noite, comer, nada, fazer caf da manh beba, gua pergunta, o departamento poder compreendo, transmitir, importantes, diagn stico entendi, altera o, dez, ciente que, adaptar, direito, solicitar, telefonando precisar, instru es, procurar, Servi o, esclarecer, d vidas 13 N o 28/01/2021 11 N o N o N o N o

1/23/2021 14:19:41 N o SIM, aceito participar. LG 1979 Sim P s-Gradua o (especializa o, mestrado e/ou doutorado). Centro-Oeste Casado(a) / Vive junto 4 Feminino Sim Sim Sim 67 157 N o N o. N o 1 a 5 anos. N o, n o tenho nenhuma dessas doen as 3 est mago raio x, vazio durar, horas pequeno, caf a meia-noite, comer, nada, fazer caf da manh beba, gua pergunta, o departamento poder compreendo, transmitir, importantes, diagn stico entendi, altera o, dez, ciente que, adaptar, direito, solicitar, telefonando precisar, instru es, procurar, Servi o, esclarecer, d vidas 13 N o 28/01/2021 11 N o N o N o N o

1/23/2021 14:54:34 N o SIM, aceito participar. El 1957 Sim P s-Gradua o (especializa o, mestrado e/ou doutorado). Nordeste Solteiro(a) 05 Feminino Sou aposentado(a) / pensionista Sim Sim 67 161 N o N o. Sim Mais de 10 anos. Diabetes, Doen a nos rins 10 est mago raio x, vazio durar, horas pequeno, caf a meia-noite, comer, nada, fazer caf da manh beba, gua pergunta, o departamento poder compreendo, transmitir, importantes, diagn stico entendi, altera o, dez, ciente que, adaptar, direito, solicitar, telefonando precisar, instru es, procurar, Servi o, esclarecer, d vidas 13 N o 28/01/2021 11 N o N o N o N o

1/23/2021 16:49:59 N o SIM, aceito participar. S 1956 Sim Ensino superior completo (faculdade/universidade). Sudeste Casado(a) / Vive junto 2 Feminino Sou aposentado(a) / pensionista Sim Sim 59 154 N o Sim, s vezes. N o Mais de 10 anos. N o, n o tenho nenhuma dessas doen as 5 pontos raio x, vazio durar, horas pequeno, caf a meia-noite, comer, nada, fazer caf da manh beba, gua pergunta, o departamento poder compreendo, transmitir, importantes, diagn stico entendi, altera o, dez, ciente que, adaptar, direito, solicitar, telefonando precisar, instru es, procurar, Servi o, esclarecer, d vidas 13:00 horas N o 28/01/2021 11:00 hs N o N o N o N o

1/23/2021 17:28:18 N o SIM, aceito participar. CS 1975 Sim Ensino m dio completo (colegial). Sul Solteiro(a) 2 Feminino N o Sim Sim 66 160 N o N o. N o Menos de 1 ano. N o, n o tenho nenhuma dessas doen as 3 est mago raio x, vazio durar, horas pequeno, caf a meia-noite, comer, nada, fazer caf da manh beba, gua pergunta, o departamento poder compreendo, transmitir, importantes, diagn stico entendi, altera o, dez, ciente que, adaptar, direito, solicitar, telefonando precisar, instru es, procurar, Servi o, esclarecer, d vidas 19 hs N o 28/01/2021 9hs N o N o N o Sim

1/23/2021 17:37:19 N o SIM, aceito participar. Ad 1968 Sim Ensino superior completo (faculdade/universidade). Centro-Oeste Solteiro(a) 3 Feminino N o Sim Sim 93 160 N o Sim, s vezes. Sim Mais de 10 anos. N o, n o tenho nenhuma dessas doen as 6 est mago raio x, vazio durar, horas pequeno, caf a meia-noite, comer, nada, fazer caf da manh beba, gua pergunta, o departamento poder compreendo, transmitir, importantes, diagn stico entendi, altera o, dez, ciente que, adaptar, direito, solicitar, telefonando precisar, instru es, procurar, Servi o, esclarecer, d vidas 13 N o 28/01/2021 11 N o Sim N o N o

1/23/2021 18:34:13 N o SIM, aceito participar. RU 1976 Sim Ensino m dio completo (colegial). Sudeste Casado(a) / Vive junto 4 Feminino N o Sim Sim 59 159 N o Sim, s vezes. N o 5 a 10 anos. N o, n o tenho nenhuma dessas doen as 1 est mago raio x, vazio durar, horas pequeno, caf a meia-noite, comer, nada, fazer caf da manh beba, gua pergunta, o departamento poder compreendo, transmitir, importantes, diagn stico entendi, altera o, dez, ciente que, adaptar, direito, solicitar, telefonando precisar, instru es, procurar, Servi o, esclarecer, d vidas 13 N o 28/01/2021 11 Sim Sim N o N o

1/23/2021 19:58:03 N o SIM, aceito participar. Cl 1969 Sim Ensino m dio completo (colegial). Sudeste Solteiro(a) 2 Feminino N o Sim Sim 65 162 Sim Sim, s vezes. N o 5 a 10 anos. N o, n o tenho nenhuma dessas doen as 2 est mago raio x, vazio durar, horas pequeno, caf a meia-noite, comer, nada, fazer caf da manh beba, gua pergunta, o departamento poder compreendo, transmitir, importantes, diagn stico entendi, altera o, dez, ciente que, adaptar, direito, solicitar, telefonando precisar, instru es, procurar, Servi o, esclarecer, d vidas 13 Sim 28/01/2021 11 N o N o Sim Sim

1/23/2021 20:05:02 N o SIM, aceito participar. Ar 1981 Sim Ensino superior completo (faculdade/universidade). Sul Casado(a) / Vive junto 4 Feminino N o Sim Sim 70 167 N o Sim, s vezes. N o Menos de 1 ano. N o, n o tenho nenhuma dessas doen as 2 est mago raio x, vazio durar, horas pequeno, caf a meia-noite, comer, nada, fazer caf da manh beba, gua pergunta, o departamento poder compreendo, transmitir, importantes, diagn stico entendi, altera o, dez, ciente que, adaptar, direito, solicitar, telefonando precisar, instru es, procurar, Servi o, esclarecer, d vidas 13 horas N o 28/01/2021 11:30 N o N o N o N o

1/23/2021 21:49:26 N o SIM, aceito participar. Iv 1978 Sim Ensino m dio completo (colegial). Nordeste Casado(a) / Vive junto 2 Feminino Sim Sim Sim 100 158 N o Sim, s vezes. Sim 5 a 10 anos. Outra que n o est entre as op es de resposta 6 est mago raio x, vazio durar, horas pequeno, caf a meia-noite, comer, nada, fazer caf da manh beba, gua pergunta, o departamento poder compreendo, transmitir, importantes, diagn stico entendi, altera o, dez, ciente que, adaptar, direito, solicitar, telefonando precisar, instru es, procurar, Servi o, esclarecer, d vidas 13:00 hrs N o 28/01/2021 11:00 hrs N o Sim N o N o



1/23/2021 22:38:20 N o SIM, aceito participar. Si 13/10/1968 Sim Ensino m dio completo (colegial). Sul Casado (a) / Vive junto 2 Feminino Sim Sim Sim 82 156 N o N o. N o 5 a 10 anos. Diabetes 4 est mago raio x, vazio durar, horas pequeno, caf a meia-noite, comer, nada, fazer caf da manh beba, gua pergunta, o departament o poder compreendo, transmitir, importantes, diagn stico entendi, altera o, dez, ciente que, adaptar, direito, soli citar, telefonando precisar, instru es, procurar, Servi o, esclarecer, d vidas 13 N o 21/01/2021 11 N o N o N o N o

1/23/2021 23:10:35 N o SIM, aceito participar. SI 1961 Sim Ensino superior completo (faculdade/universidade). C entro-Oeste Solteiro(a) 2 Feminino Sou aposentado(a) / pensionista Sim Sim 69 170 N o N o. Sim 1 a 5 anos. Ou tra que n o est entre as op es de resposta 3 est mago raio x, vazio durar, horas pequeno, caf a meia-noite , comer, nada, fazer caf da manh beba, gua pergunta, o departamento poder compreendo, transmitir, importan tes, diagn stico entendi, altera o, dez, ciente que, adaptar, direito, solicitar, telefonando precisar, instru es, procurar, Servi o, esclarecer, d vidas 13 horas N o 28/01/2021 11 horas Sim N o N o N o

1/24/2021 0:05:50 N o SIM, aceito participar. An 1979 Sim Ensino m dio completo (colegial). Nordeste Separad o(a) / Divorciado(a) 5 Feminino Sim Sim Sim 85 165 N o Sim, s vezes. N o 1 a 5 anos. N o, n o tenho nen huma dessas doen as 1 est mago raio x, vazio durar, horas pequeno, caf a meia-noite, comer, nada, fazer caf da manh beba, gua pergunta, o departamento poder compreendo, transmitir, importantes, diagn stico entendi, altera o, dez, ciente que, adaptar, direito, solicitar, telefonando precisar, instru es, procurar, Servi o, esclar ecer, d vidas 13 horas Sim 28/01/2021 11h N o N o N o N o

1/24/2021 4:35:13 N o SIM, aceito participar. Sa 1973 Sim Ensino m dio completo (colegial). Sudeste Casado(a) / Vive junto 5 Feminino N o Sim Sim 84 168 Sim N o. N o 5 a 10 anos. N o, n o tenho nenhuma dessas do en as 2 est mago raio x, vazio durar, horas pequeno, caf a meia-noite, comer, nada, fazer caf da manh beb a, gua pergunta, o departamento poder compreendo, transmitir, importantes, diagn stico entendi, altera o, de z, ciente que, adaptar, direito, solicitar, telefonando precisar, instru es, procurar, Servi o, esclarecer, d vidas 13 N o 28/01/2021 11 N o N o N o N o

1/24/2021 9:38:37 N o SIM, aceito participar. Mr 1969 Sim Ensino fundamental completo. Centro-Oeste Casado(a) / Vive junto 1 Masculino Sim Sim Sim 93 170 Sim Sim, frequentemente. N o Menos de 1 ano. AVC (derrame) 1 7 pontos raio x, vazio durar, horas pequeno, caf a meia-noite, comer, nada, fazer caf da manh beba, gua pe rgunta, o departamento poder compreendo, transmitir, importantes, diagn stico entendi, altera o, dez, ciente qu e, adaptar, direito, solicitar, telefonando precisar, instru es, procurar, Servi o, esclarecer, d vidas 13h N o 1 3/02/2021 11 Sim Sim N o N o

1/24/2021 10:05:30 N o SIM, aceito participar. Re 1962 Sim Ensino m dio completo (colegial). Nordeste Solteir o(a) 3 Feminino N o Sim Sim 106 173 N o N o. N o Mais de 10 anos. N o, n o tenho nenhuma dessas doe n as 5 pontos raio x, vazio durar, horas pequeno, caf a meia-noite, comer, nada, fazer caf da manh beba, gua pergunta, o departamento poder compreendo, transmitir, importantes, diagn stico entendi, altera o, dez, cie nte que, adaptar, direito, solicitar, telefonando precisar, instru es, procurar, Servi o, esclarecer, d vidas 13 N o 24/07/2021 11 N o N o N o N o

1/24/2021 11:16:38 N o SIM, aceito participar. Ro 1966 Sim Ensino superior completo (faculdade/universidade). Sul Casado(a) / Vive junto 2 Feminino Sou aposentado(a) / pensionista Sim Sim 88 149 N o Sim, s vezes. Sim Mais de 10 anos. Outra que n o est entre as op es de resposta 3 est mago raio x, vazio durar, horas pequen o, caf a meia-noite, comer, nada, fazer caf da manh beba, gua pergunta, o departamento poder compreendo , transmitir, importantes, diagn stico entendi, altera o, dez, ciente que, adaptar, direito, solicitar, telefonando pr ecisar, instru es, procurar, Servi o, esclarecer, d vidas 13 N o 28/01/2021 11 N o N o N o N o

1/24/2021 11:36:33 N o SIM, aceito participar. Si 1972 Sim Ensino fundamental completo. Sul Casado(a) / Vive j unto 3 Feminino N o Sim Sim 130 160 N o Sim, s vezes. N o Menos de 1 ano. Diabetes, Outra que n o est entre as op es de resposta 3 est mago raio x, vazio durar, horas pequeno, caf a meia-noite, comer, nada, f azer caf da manh beba, gua pergunta, o departamento poder compreendo, transmitir, importantes, diagn stic o entendi, altera o, dez, ciente que, adaptar, direito, solicitar, telefonando precisar, instru es, procurar, Servi o, esclarecer, d vidas 13 hs N o 28/01/2021 11 hs Sim Sim Sim Sim

1/24/2021 12:47:02 N o SIM, aceito participar. Ma 1963 Sim Ensino m dio completo (colegial). Sudeste Separad o(a) / Divorciado(a) 2 Masculino Sim Sim Sim 90 180 Sim Sim, s vezes. N o Mais de 10 anos. N o, n o tenh o nenhuma dessas doen as 01 est mago raio x, vazio durar, horas pequeno, caf a meia-noite, comer, nada, fazer caf da manh beba, gua pergunta, o departamento poder compreendo, transmitir, importantes, diagn stico en tendi, altera o, dez, ciente que, adaptar, direito, solicitar, telefonando precisar, instru es, procurar, Servi o, esclarecer, d vidas 13 N o 28/01/2021 11 N o N o N o N o

1/24/2021 14:47:26 N o SIM, aceito participar. cr 1968 Sim Ensino superior completo (faculdade/universidade). S

udeste Casado(a) / Vive junto 2 Feminino Sim Sim Sim 64 160 N o N o. N o 5 a 10 anos. N o, n o tenho nenhuma dessas doen as 2 est mago raio x, vazio durar, horas pequeno, caf a meia-noite, comer, nada, fazer caf da manh beba, gua pergunta, o departamento poder compreendo, transmitir, importantes, diagn stico entendi, altera o, dez, ciente que, adaptar, direito, solicitar, telefonando precisar, instru es, procurar, Servi o, esclarecer, d vidas 13 horas N o 27/01/2021 11 horas N o Sim N o N o

1/24/2021 15:12:52 N o SIM, aceito participar. JA 1979 Sim Ensino m dio completo (colegial). Sudeste Casado(a) / Vive junto 3 Feminino Sim Sim Sim 89 158 N o N o. N o Mais de 10 anos. N o, n o tenho nenhuma dessas doen as 3 est mago raio x, vazio durar, horas pequeno, caf a meia-noite, comer, nada, fazer caf da manh beba, gua pergunta, o departamento poder compreendo, transmitir, importantes, diagn stico entendi, altera o, dez, ciente que, adaptar, direito, solicitar, telefonando precisar, instru es, procurar, Servi o, esclarecer, d vidas 13 horas N o 28/01/2021 11 horas N o N o N o N o

1/24/2021 15:47:36 N o SIM, aceito participar. SI 1966 Sim Ensino m dio completo (colegial). Centro-Oeste Casado(a) / Vive junto 1 Feminino N o Sim Sim 54 151 N o Sim, s vezes. N o 5 a 10 anos. N o, n o tenho nenhuma dessas doen as 5 est mago raio x, vazio durar, horas pequeno, caf a meia-noite, comer, nada, fazer caf da manh beba, gua pergunta, o departamento poder compreendo, transmitir, importantes, diagn stico entendi, altera o, dez, ciente que, adaptar, direito, solicitar, telefonando precisar, instru es, procurar, Servi o, esclarecer, d vidas 13h N o 28/01/2021 11h Sim Sim N o Sim

1/24/2021 18:55:10 N o SIM, aceito participar. Fa 1976 Sim Ensino m dio completo (colegial). Sudeste Casado(a) / Vive junto 3 Feminino Sim Sim Sim 100 166 N o N o. N o 1 a 5 anos. N o, n o tenho nenhuma dessas doen as 1 est mago raio x, vazio durar, horas pequeno, caf a meia-noite, comer, nada, fazer caf da manh beba, gua pergunta, o departamento poder compreendo, transmitir, importantes, diagn stico entendi, altera o, dez, ciente que, adaptar, direito, solicitar, telefonando precisar, instru es, procurar, Servi o, esclarecer, d vidas 13 N o 28/01/2021 11 N o N o N o N o

1/24/2021 18:59:29 N o SIM, aceito participar. Mo 1973 Sim Ensino superior completo (faculdade/universidade). Sudeste Casado(a) / Vive junto 4 Feminino Sim Sim Sim 73 163 N o N o. N o Mais de 10 anos. N o, n o tenho nenhuma dessas doen as 3 est mago raio x, vazio durar, horas pequeno, caf a meia-noite, comer, nada, fazer caf da manh beba, gua pergunta, o departamento poder compreendo, transmitir, importantes, diagn stico entendi, altera o, dez, ciente que, adaptar, direito, solicitar, telefonando precisar, instru es, procurar, Servi o, esclarecer, d vidas 13 horas N o 28/01/2021 As 11 horas N o N o N o N o

1/24/2021 19:32:02 N o SIM, aceito participar. An 1971 Sim Ensino m dio completo (colegial). Nordeste Solteiro(a) 3 Feminino N o Sim Sim 57 148 N o Sim, s vezes. Sim Mais de 10 anos. N o, n o tenho nenhuma dessas doen as 5 est mago raio x, vazio durar, horas pequeno, caf a meia-noite, comer, nada, fazer caf da manh beba, gua pergunta, o departamento poder compreendo, transmitir, importantes, diagn stico entendi, altera o, dez, ciente que, adaptar, direito, solicitar, telefonando precisar, instru es, procurar, Servi o, esclarecer, d vidas 13 Sim 28/01/2021 11 Sim Sim Sim Sim

1/24/2021 20:39:31 N o SIM, aceito participar. FS 1980 Sim P s-Gradua o (especializa o, mestrado e/ou doutorado). Nordeste Casado(a) / Vive junto 2 Feminino Sim Sim Sim 98 163 N o Sim, s vezes. Sim 5 a 10 anos. Diabetes 7 est mago raio x, vazio durar, horas pequeno, caf a meia-noite, comer, nada, fazer caf da manh beba, gua pergunta, o departamento poder compreendo, transmitir, importantes, diagn stico entendi, altera o, dez, ciente que, adaptar, direito, solicitar, telefonando precisar, instru es, procurar, Servi o, esclarecer, d vidas 13 N o 28/01/2021 11 N o N o N o N o

1/24/2021 20:49:02 N o SIM, aceito participar. Fe 1971 Sim Ensino m dio completo (colegial). Sudeste Separado(a) / Divorciado(a) 4 Feminino Sim Sim Sim 89 164 N o Sim, s vezes. N o 1 a 5 anos. Diabetes, Outra que n o est entre as op es de resposta 5 est mago raio x, vazio durar, horas pequeno, caf a meia-noite, comer, nada, fazer caf da manh beba, gua pergunta, o departamento poder compreendo, transmitir, importantes, diagn stico entendi, altera o, dez, ciente que, adaptar, direito, solicitar, telefonando precisar, instru es, procurar, Servi o, esclarecer, d vidas 13hs N o 28/01/2021 11hs Sim Sim Sim N o

1/24/2021 21:02:40 N o SIM, aceito participar. Si 1970 Sim Ensino m dio completo (colegial). Sudeste Casado(a) / Vive junto 3 Feminino Sim Sim Sim 79 161 N o Sim, s vezes. N o 1 a 5 anos. N o, n o tenho nenhuma dessas doen as 3 est mago raio x, vazio durar, horas pequeno, caf a meia-noite, comer, nada, fazer caf da manh beba, gua pergunta, o departamento poder compreendo, transmitir, importantes, diagn stico entendi, altera o, dez, ciente que, adaptar, direito, solicitar, telefonando precisar, instru es, procurar, Servi o, esclarecer, d vidas 13 N o 28/01/2021 11 Sim Sim N o Sim

1/24/2021 21:13:48 N o SIM, aceito participar. Ro 1963 Sim Ensino superior completo (faculdade/universidade). Nordeste Solteiro(a) 2 Feminino Sou aposentado(a) / pensionista Sim Sim 75 156 N o N o. N o Mais de 10 ano

s. N o, n o tenho nenhuma dessas doen as 1 est mago raio x, vazio durar, horas pequeno, caf a meia-noite, comer, nada, fazer caf da manh beba, gua pergunta, o departamento poder compreendo, transmitir, importantes, diagn stico entendi, altera o, dez, ciente que, adaptar, direito, solicitar, telefonando precisar, instru es, procurar, Servi o, esclarecer, d vidas 13 N o 28/01/2021 11 N o N o N o Sim 1/24/2021 21:21:57 N o SIM, aceito participar. Ms 78 Sim Ensino m dio completo (colegial). Sul Solteiro(a) 3 F eminino N o Sim Sim 120 159 N o N o. N o 5 a 10 anos. Diabetes, Outra que n o est entre as op es d e resposta 14 est mago raio x, vazio durar, horas pequeno, caf a meia-noite, comer, nada, fazer cl nica beba, gua pergunta, o departamento poder compreendo, transmitir, importantes, diagn stico entendi, altera o, dez, cie nte que, adaptar, direito, solicitar, telefonando precisar, instru es, procurar, Servi o, esclarecer, d vidas 19hs Sim 28/02/2021 11h30 N o N o N o N o

1/24/2021 23:26:31 N o SIM, aceito participar. Ma 1962 Sim Ensino m dio completo (colegial). Sudeste Casado(a) / Vive junto 3 Feminino N o Sim Sim 85 159 N o N o. N o 5 a 10 anos. N o, n o tenho nenhuma dessas doen as 3 est mago raio x, vazio durar, horas pequeno, caf a meia-noite, comer, nada, fazer caf da manh beba, gua pergunta, o departamento poder compreendo, transmitir, importantes, diagn stico entendi, altera o, dez, ciente que, adaptar, direito, solicitar, telefonando precisar, instru es, procurar, Servi o, esclarecer, d vid as 13 hrs N o 24/01/2021 11hrs Sim Sim N o N o

1/25/2021 1:12:09 N o SIM, aceito participar. Sh 1966 Sim P s-Gradua o (especializa o, mestrado e/ou d outorado). Sudeste Separado(a) / Divorciado(a) 2 Feminino N o Sim Sim 82 172 N o N o. N o Mais de 10 an os. N o, n o tenho nenhuma dessas doen as 4 est mago raio x, vazio durar, horas pequeno, caf a meia-noite, comer, nada, fazer caf da manh beba, gua pergunta, o departamento poder compreendo, transmitir, importantes, diagn stico entendi, altera o, dez, ciente que, adaptar, direito, solicitar, telefonando precisar, instru es, p rocurar, Servi o, esclarecer, d vidas 13 horas N o 28/01/2021 11 horas N o N o N o N o

1/25/2021 6:04:23 N o SIM, aceito participar. He 1967 Sim P s-Gradua o (especializa o, mestrado e/ou doutorado). Norte Casado(a) / Vive junto 2 Feminino Sim Sim Sim 60 158 N o N o. N o 1 a 5 anos. N o, n o tenho nenhuma dessas doen as 1 est mago raio x, vazio durar, horas pequeno, caf a meia-noite, comer, nada, fazer caf da manh beba, gua pergunta, o departamento poder compreendo, transmitir, importantes, diagn sti co entendi, altera o, dez, ciente que, adaptar, direito, solicitar, telefonando precisar, instru es, procurar, Servi o, esclarecer, d vidas 13 horas N o 28/01/2021 11 horas N o N o N o N o

1/25/2021 7:33:57 N o SIM, aceito participar. Ag 1934 Sim Ensino fundamental completo. Nordeste Casado(a) / V ive junto 5 Masculino Sou aposentado(a) / pensionista Sim Sim 74 168 N o N o. N o 5 a 10 anos. N o, n o t enho nenhuma dessas doen as 3 est mago raio x, vazio durar, horas pequeno, caf a meia-noite, comer, nada, fa zer caf da manh beba, gua pergunta, o departamento poder compreendo, transmitir, importantes, diagn stico entendi, altera o, dez, ciente que, adaptar, direito, solicitar, telefonando precisar, instru es, procurar, Servi o, esclarecer, d vidas 13 hrs N o 28/01/2021 11 hrs N o N o N o N o

1/25/2021 7:42:35 N o SIM, aceito participar. Is 1978 Sim Ensino superior completo (faculdade/universidade). Ce ntro-Oeste Casado(a) / Vive junto 5 Feminino N o Sim Sim 63 150 N o N o. Sim Menos de 1 ano. N o, n o tenho nenhuma dessas doen as 4 est mago raio x, vazio durar, horas pequeno, caf a meia-noite, comer, nada, fa zer caf da manh beba, gua pergunta, o departamento poder compreendo, transmitir, importantes, diagn stico entendi, altera o, dez, ciente que, adaptar, direito, solicitar, telefonando precisar, instru es, procurar, Servi o, esclarecer, d vidas 13h Sim 28/01/2021 11h N o N o N o N o

1/25/2021 8:28:19 N o SIM, aceito participar. Ma 1963 Sim Ensino m dio completo (colegial). Sudeste Separado (a) / Divorciado(a) 1 Feminino N o Sim Sim 59 152 N o Sim, s vezes. N o 1 a 5 anos. N o, n o tenho nen humas dessas doen as 1 est mago raio x, vazio durar, horas pequeno, caf a meia-noite, comer, nada, fazer caf da manh beba, gua pergunta, o departamento poder compreendo, transmitir, importantes, diagn stico entendi, altera o, dez, ciente que, adaptar, direito, solicitar, telefonando precisar, instru es, procurar, Servi o, esclar ecer, d vidas 13hs N o 28/01/2021 11hs Sim Sim Sim Sim

1/25/2021 14:24:21 N o SIM, aceito participar. RI 1965 Sim P s-Gradua o (especializa o, mestrado e/ou doutorado). Nordeste Casado(a) / Vive junto 3 Feminino Sim Sim Sim 69 160 N o Sim, s vezes. Sim Menos de 1 ano. N o, n o tenho nenhuma dessas doen as 1 est mago raio x, vazio durar, horas pequeno, caf a meia-no ite, comer, nada, fazer caf da manh beba, gua pergunta, o departamento poder compreendo, transmitir, import antes, diagn stico entendi, altera o, dez, ciente que, adaptar, direito, solicitar, telefonando precisar, instru es e s, procurar, Servi o, esclarecer, d vidas 13 N o 28/01/2021 11 N o N o N o Sim

1/25/2021 15:05:26 N o SIM, aceito participar. Ma 1962 Sim Ensino superior completo (faculdade/universidade). Sudeste Casado(a) / Vive junto 3 Feminino Sou aposentado(a) / pensionista Sim Sim 87 175 N o Sim, s vezes. S im 1 a 5 anos. N o, n o tenho nenhuma dessas doen as 4 est mago raio x, vazio durar, horas pequeno, caf a

meia-noite, comer, nada, fazer caf da manh beba,  gua pergunta, o departamento poder compreendo, transmitir, importantes, diagnstico entendi, altera o, dez, ciente que, adaptar, direito, solicitar, telefonando precisar, instru es, procurar, Servi o, esclarecer, d vidas 13 N o 28/01/2021 11 N o Sim N o N o 1/25/2021 15:37:35 N o SIM, aceito participar. An 1975 Sim Ensino mdio completo (colegial). Sul Casado(a) / Vive junto 3 Feminino Sim Sim Sim 107 162 N o N o. N o 5 a 10 anos. N o, n o tenho nenhuma dessas doenas 4 estmago raio x, vazio durar, horas pequeno, caf a meia-noite, comer, nada, fazer caf da manh beba,  gua pergunta, o departamento poder compreendo, transmitir, importantes, diagnstico entendi, altera o, dez, ciente que, adaptar, direito, solicitar, telefonando precisar, instru es, procurar, Servi o, esclarecer, d vidas 13 hrs N o 28/01/2021 11hrs N o N o N o N o 1/25/2021 18:33:51 N o SIM, aceito participar. Ve 1969 Sim Ensino mdio completo (colegial). Sudeste Casado(a) / Vive junto 6 Feminino Sim Sim Sim 103 158 N o N o. N o Mais de 10 anos. Diabetes, Doena nos rins, Outra que n o est entre as op es de resposta 7 estmago raio x, vazio durar, horas pequeno, caf a meia-noite, comer, nada, fazer caf da manh beba,  gua pergunta, o departamento poder compreendo, transmitir, importantes, diagnstico entendi, altera o, dez, ciente que, adaptar, direito, solicitar, telefonando precisar, instru es, procurar, Servi o, esclarecer, d vidas 13 N o 28/01/2021 11 Sim Sim N o Sim 1/25/2021 19:07:22 N o SIM, aceito participar. Cl 1970 Sim Ensino superior completo (faculdade/universidade). Sudeste Separado(a) / Divorciado(a) 4 Feminino Sou aposentado(a) / pensionista Sim Sim 74 160 N o N o. Sim Mais de 10 anos. Diabetes, Outra que n o est entre as op es de resposta 6 estmago raio x, vazio durar, horas pequeno, caf a meia-noite, comer, nada, fazer caf da manh beba,  gua pergunta, o departamento poder compreendo, transmitir, importantes, diagnstico entendi, altera o, dez, ciente que, adaptar, direito, solicitar, telefonando precisar, instru es, procurar, Servi o, esclarecer, d vidas 13 hs N o 17/09/2020 11hs N o Sim N o N o 1/25/2021 20:21:20 N o SIM, aceito participar. Ma 1954 Sim Ensino superior completo (faculdade/universidade). Nordeste Vivo(a) 4 Feminino Sou aposentado(a) / pensionista Sim Sim 96 164 N o N o. N o Mais de 10 anos. Outra que n o est entre as op es de resposta 3 estmago raio x, vazio durar, horas pequeno, caf a meia-noite, comer, nada, fazer caf da manh beba,  gua pergunta, o departamento poder compreendo, transmitir, importantes, diagnstico entendi, altera o, dez, ciente que, adaptar, direito, solicitar, telefonando precisar, instru es, procurar, Servi o, esclarecer, d vidas 13 horas N o 28/01/2021 11 horas N o N o N o Sim 1/25/2021 21:03:15 N o SIM, aceito participar. Ve 1960 Sim Ensino mdio completo (colegial). Nordeste Casado(a) / Vive junto 5 Feminino N o Sim Sim 65 150 N o N o. Sim 5 a 10 anos. Outra que n o est entre as op es de resposta 4 estmago raio x, vazio durar, horas pequeno, caf a meia-noite, comer, nada, fazer caf da manh beba,  gua pergunta, o departamento poder compreendo, transmitir, importantes, diagnstico entendi, altera o, dez, ciente que, adaptar, direito, solicitar, telefonando precisar, instru es, procurar, Servi o, esclarecer, d vidas 13 N o 28/01/2021 11 N o Sim N o N o 1/25/2021 23:59:36 N o SIM, aceito participar. SA 1963 Sim Ensino superior completo (faculdade/universidade). Sudeste Casado(a) / Vive junto 3 Feminino Sou aposentado(a) / pensionista Sim Sim 76 158 N o Sim,  s vezes. N o 5 a 10 anos. N o, n o tenho nenhuma dessas doenas 2 estmago raio x, vazio durar, horas pequeno, caf a meia-noite, comer, nada, fazer caf da manh beba,  gua pergunta, o departamento poder compreendo, transmitir, importantes, diagnstico entendi, altera o, dez, ciente que, adaptar, direito, solicitar, telefonando precisar, instru es, procurar, Servi o, esclarecer, d vidas 13 N o 28/01/2021 11 N o N o N o N o 1/26/2021 0:13:23 N o SIM, aceito participar. Ci 1977 Sim Ensino mdio completo (colegial). Centro-Oeste Vivo(a) 1 Feminino Sou aposentado(a) / pensionista Sim Sim 103 168 N o Sim,  s vezes. Sim Mais de 10 anos. Diabetes 5 estmago raio x, vazio durar, horas pequeno, caf a meia-noite, comer, nada, fazer caf da manh beba,  gua pergunta, o departamento poder compreendo, transmitir, importantes, diagnstico entendi, altera o, dez, ciente que, adaptar, direito, solicitar, telefonando precisar, instru es, procurar, Servi o, esclarecer, d vidas Uma hora da tarde N o 28/01/2021 11 horas N o N o N o Sim 1/26/2021 0:59:36 N o SIM, aceito participar. Ce 1962 Sim Ensino mdio completo (colegial). Sudeste Casado(a) / Vive junto 4 Feminino Sou aposentado(a) / pensionista Sim Sim 67 168 N o Sim,  s vezes. Sim Menos de 1 ano. N o, n o tenho nenhuma dessas doenas 1 estmago raio x, vazio durar, horas pequeno, caf a meia-noite, comer, nada, fazer caf da manh beba,  gua pergunta, o departamento poder compreendo, transmitir, importantes, diagnstico entendi, altera o, dez, ciente que, adaptar, direito, solicitar, telefonando precisar, instru es, procurar, Servi o, esclarecer, d vidas 13 N o 28/01/2021 11 N o N o N o N o 1/26/2021 9:43:48 N o SIM, aceito participar. Ca 1958 Sim Ensino mdio completo (colegial). Sudeste Vivo(a) 2 Masculino Sou aposentado(a) / pensionista Sim Sim 93 175 N o Sim,  s vezes. N o Mais de 10 anos. N o, n o tenho nenhuma dessas doenas 0 estmago raio x, vazio durar, horas pequeno, caf a meia-noite, comer, nada,

da, fazer café da manhã beba, ☐ gua pergunta, o departamento poder compreendo, transmitir, importantes, diagnóstico entendi, altera☐ ☐ o, dez, ciente que, adaptar, direito, solicitar, telefonando precisar, instru☐ ☐ es, procurar, Servi☐ o, esclarecer, d☐ vidas 13 N☐ o 28/01/2021 11h30 N☐ o N☐ o N☐ o

1/26/2021 13:33:42 N☐ o SIM, aceito participar. Re 1966 Sim Ensino médio completo (colegial). Nordeste Separado(a) / Divorciado(a) 3 Feminino N☐ o Sim Sim 55 150 N☐ o N☐ o. N☐ o Mais de 10 anos. N☐ o, n☐ o tenho nenhuma dessas doenças 1 est☐ mago raio x, vazio durar, horas pequeno, café a meia-noite, comer, nada, fazer café da manhã beba, ☐ gua pergunta, o departamento poder compreendo, transmitir, importantes, diagnóstico entendi, altera☐ ☐ o, dez, ciente que, adaptar, direito, solicitar, telefonando precisar, instru☐ ☐ es, procurar, Servi☐ o, esclarecer, d☐ vidas 13:00hs N☐ o 28/01/2021 11:00hs N☐ o N☐ o N☐ o N☐ o

1/26/2021 13:49:05 N☐ o SIM, aceito participar. Ro 1952 Sim Ensino superior completo (faculdade/universidade). Sul Casado(a) / Vive junto 2 Masculino Sou aposentado(a) / pensionista Sim Sim 76 156 N☐ o N☐ o. N☐ o Mais de 10 anos. N☐ o, n☐ o tenho nenhuma dessas doenças 7 est☐ mago raio x, vazio durar, horas pequeno, café a meia-noite, comer, nada, fazer café da manhã beba, ☐ gua pergunta, o departamento poder compreendo, transmitir, importantes, diagnóstico entendi, altera☐ ☐ o, dez, ciente que, adaptar, direito, solicitar, telefonando precisar, instru☐ ☐ es, procurar, Servi☐ o, esclarecer, d☐ vidas 13 Sim 28/01/2021 11 N☐ o N☐ o N☐ o Sim

1/26/2021 14:09:10 N☐ o SIM, aceito participar. Ro 1961 Sim Ensino fundamental completo. Sudeste Casado(a) / Vive junto 2 Feminino Sim Sim Sim 78 150 N☐ o N☐ o. N☐ o Mais de 10 anos. N☐ o, n☐ o tenho nenhuma dessas doenças 4 est☐ mago raio x, vazio durar, horas pequeno, café a meia-noite, comer, nada, fazer café da manhã beba, ☐ gua pergunta, o departamento poder compreendo, transmitir, importantes, diagnóstico entendi, altera☐ ☐ o, dez, ciente que, adaptar, direito, solicitar, telefonando precisar, instru☐ ☐ es, procurar, Servi☐ o, esclarecer, d☐ vidas 13 N☐ o 28/01/2021 11 Sim N☐ o N☐ o Sim

1/26/2021 14:33:08 N☐ o SIM, aceito participar. Lu 1982 Sim Ensino médio completo (colegial). Centro-Oeste Separado(a) / Divorciado(a) 4 Feminino N☐ o Sim Sim 100 165 Sim N☐ o. N☐ o 1 a 5 anos. N☐ o, n☐ o tenho nenhuma dessas doenças 5 est☐ mago raio x, vazio durar, horas pequeno, café a meia-noite, comer, nada, fazer café da manhã beba, ☐ gua pergunta, o departamento poder compreendo, transmitir, importantes, diagnóstico entendi, altera☐ ☐ o, dez, ciente que, adaptar, direito, solicitar, telefonando precisar, instru☐ ☐ es, procurar, Servi☐ o, esclarecer, d☐ vidas As 13 horas N☐ o 28/01/2021 11 horas Sim Sim Sim Sim

1/26/2021 16:22:11 N☐ o SIM, aceito participar. Ad 1977 Sim Ensino médio completo (colegial). Sudeste Solteiro(a) 5 Feminino N☐ o Sim Sim 170 183 N☐ o N☐ o. N☐ o Mais de 10 anos. Diabetes 3 est☐ mago raio x, vazio durar, horas pequeno, café a meia-noite, comer, nada, fazer café da manhã beba, ☐ gua pergunta, o departamento poder compreendo, transmitir, importantes, diagnóstico entendi, altera☐ ☐ o, dez, ciente que, adaptar, direito, solicitar, telefonando precisar, instru☐ ☐ es, procurar, Servi☐ o, esclarecer, d☐ vidas 13 Sim 28/01/2021 15 N☐ o Sim N☐ o N☐ o

1/26/2021 18:57:49 N☐ o SIM, aceito participar. No 68 Sim Ensino médio completo (colegial). Sudeste Casado(a) / Vive junto 3 Feminino N☐ o Sim Sim 75 170 N☐ o N☐ o. Sim 5 a 10 anos. N☐ o, n☐ o tenho nenhuma dessas doenças 6 est☐ mago raio x, vazio durar, horas pequeno, café a meia-noite, comer, nada, fazer café da manhã beba, ☐ gua pergunta, o departamento poder compreendo, transmitir, importantes, diagnóstico entendi, altera☐ ☐ o, dez, ciente que, adaptar, direito, solicitar, telefonando precisar, instru☐ ☐ es, procurar, Servi☐ o, esclarecer, d☐ vidas Treze horas N☐ o 29/01/2021 Onze horas Sim Sim Sim N☐ o

1/26/2021 21:46:03 N☐ o SIM, aceito participar. EU 1960 Sim Ensino superior completo (faculdade/universidade). Nordeste Casado(a) / Vive junto 2 Feminino N☐ o Sim Sim 65 161 N☐ o N☐ o. Sim Mais de 10 anos. Diabetes 2 est☐ mago raio x, vazio durar, horas pequeno, café a meia-noite, comer, nada, fazer café da manhã beba, ☐ gua pergunta, o departamento poder compreendo, transmitir, importantes, diagnóstico entendi, altera☐ ☐ o, dez, ciente que, adaptar, direito, solicitar, telefonando precisar, instru☐ ☐ es, procurar, Servi☐ o, esclarecer, d☐ vidas 13 N☐ o 28/01/2021 11 N☐ o N☐ o N☐ o N☐ o

1/26/2021 22:04:09 N☐ o SIM, aceito participar. KA 1978 Sim Pós-Graduação (especialização, mestrado e/ou doutorado). Sudeste Casado(a) / Vive junto 4 Feminino Sim Sim Sim 110 165 N☐ o N☐ o. Sim Mais de 10 anos. N☐ o, n☐ o tenho nenhuma dessas doenças 2 est☐ mago raio x, vazio durar, horas pequeno, café a meia-noite, comer, nada, fazer café da manhã beba, ☐ gua pergunta, o departamento poder compreendo, transmitir, importantes, diagnóstico entendi, altera☐ ☐ o, dez, ciente que, adaptar, direito, solicitar, telefonando precisar, instru☐ ☐ es, procurar, Servi☐ o, esclarecer, d☐ vidas 13h N☐ o 28/01/2021 11h N☐ o N☐ o Sim Sim

1/26/2021 22:22:58 N☐ o SIM, aceito participar. Ma 1965 Sim Ensino médio completo (colegial). Sudeste Casado(a) / Vive junto 3 Feminino Sim Sim Sim 65 145 N☐ o N☐ o. N☐ o 5 a 10 anos. N☐ o, n☐ o tenho nenhuma dessas doenças 5 est☐ mago raio x, vazio durar, horas pequeno, café a meia-noite, comer, nada, fazer café da manhã beba, ☐ gua pergunta, o departamento poder compreendo, transmitir, importantes, diagnóstico entendi, altera☐ ☐ o, dez, ciente que, adaptar, direito, solicitar, telefonando precisar, instru☐ ☐ es, procurar, Servi☐ o, esclarecer, d☐ vidas 13 N☐ o 28/01/2021 11 N☐ o N☐ o N☐ o N☐ o

ez, ciente que, adaptar, direito, solicitar, telefonando precisar, instruções, procurar, Serviço, esclarecer, dividas 13 N o 28/01/2021 11:30 Sim Sim N o Sim

1/26/2021 22:37:43 N o SIM, aceito participar. El 1966 Sim Ensino médio completo (colegial). Sudeste Casado(a) / Vive junto 6 Feminino N o Sim Sim 80 156 Sim Sim, às vezes. Sim 1 a 5 anos. N o, n o tenho nenhuma dessas doenças 1 est mago raio x, vazio durar, horas pequeno, café a meia-noite, comer, nada, fazer café da manhã beba, sua pergunta, o departamento poder compreendo, transmitir, importantes, diagnóstico entendi, alterações o, dez, ciente que, adaptar, direito, solicitar, telefonando precisar, instruções, procurar, Serviço, esclarecer, dividas 13h N o 28/01/2021 11h Sim Sim N o N o

1/26/2021 22:59:46 N o SIM, aceito participar. Re 1970 Sim Ensino médio completo (colegial). Nordeste Separado(a) / Divorciado(a) 3 Feminino N o Sim Sim 90 160 N o Sim, às vezes. Sim 1 a 5 anos. N o, n o tenho nenhuma dessas doenças 1 est mago raio x, vazio durar, horas pequeno, café a meia-noite, comer, nada, fazer café da manhã beba, sua pergunta, o departamento poder compreendo, transmitir, importantes, diagnóstico entendi, alterações o, dez, ciente que, adaptar, direito, solicitar, telefonando precisar, instruções, procurar, Serviço, esclarecer, dividas 13 horas N o 28/01/2021 11 horas Sim Sim Sim N o

1/26/2021 23:27:02 N o SIM, aceito participar. Ja 1961 Sim Ensino médio completo (colegial). Sudeste Separado(a) / Divorciado(a) 1 Feminino Sim Sim Sim 90 165 N o N o. N o 1 a 5 anos. N o, n o tenho nenhuma dessas doenças 3 est mago raio x, vazio durar, horas pequeno, café a meia-noite, comer, nada, fazer café da manhã beba, sua pergunta, o departamento poder compreendo, transmitir, importantes, diagnóstico entendi, alterações o, dez, ciente que, adaptar, direito, solicitar, telefonando precisar, instruções, procurar, Serviço, esclarecer, dividas 12 Sim 25/02/2021 10 Sim Sim Sim Sim

1/26/2021 23:52:06 N o SIM, aceito participar. AN 1961 Sim Ensino superior completo (faculdade/universidade). Sul Separado(a) / Divorciado(a) 04 Feminino Sim Sim Sim 85 160 N o Sim, às vezes. N o 1 a 5 anos. N o, n o tenho nenhuma dessas doenças 01 est mago raio x, vazio durar, horas pequeno, café a meia-noite, comer, nada, fazer café da manhã beba, sua pergunta, o departamento poder compreendo, transmitir, importantes, diagnóstico entendi, alterações o, dez, ciente que, adaptar, direito, solicitar, telefonando precisar, instruções, procurar, Serviço, esclarecer, dividas 13 horas N o 28/01/2021 11 horas N o N o N o N o

1/27/2021 0:52:36 N o SIM, aceito participar. MA 1960 Sim Pós-Graduação (especialização, mestrado e/ou doutorado). Sul Separado(a) / Divorciado(a) 1 Feminino Sim Sim Sim 72 160 N o Sim, às vezes. Sim 1 a 5 anos. N o, n o tenho nenhuma dessas doenças 2 est mago raio x, vazio durar, horas pequeno, café a meia-noite, comer, nada, fazer café da manhã beba, sua pergunta, o departamento poder compreendo, transmitir, importantes, diagnóstico entendi, alterações o, dez, ciente que, adaptar, direito, solicitar, telefonando precisar, instruções, procurar, Serviço, esclarecer, dividas 13 horas Sim 28/01/2021 9 horas N o N o N o Sim

1/27/2021 1:10:07 N o SIM, aceito participar. RO 1975 Sim Ensino médio completo (colegial). Sudeste Solteiro(a) 4 Feminino N o Sim Sim 108 168 N o N o. N o 5 a 10 anos. Outra que n o está entre as opções de resposta 3 est mago raio x, vazio durar, horas pequeno, café a meia-noite, comer, nada, fazer café da manhã beba, sua pergunta, o departamento poder compreendo, transmitir, importantes, diagnóstico entendi, alterações o, dez, ciente que, adaptar, direito, solicitar, telefonando precisar, instruções, procurar, Serviço, esclarecer, dividas 13 N o 28/01/2021 11 Sim Sim N o Sim

1/27/2021 1:26:54 N o SIM, aceito participar. Ma 1970 Sim Ensino médio completo (colegial). Sul Solteiro(a) 3 Feminino Sou aposentado(a) / pensionista Sim Sim 73 155 N o Sim, às vezes. N o 1 a 5 anos. N o, n o tenho nenhuma dessas doenças 1 pontos raio x, vazio durar, horas pequeno, café a meia-noite, comer, nada, fazer café da manhã beba, sua pergunta, o departamento poder compreendo, transmitir, importantes, diagnóstico entendi, alterações o, dez, ciente que, adaptar, direito, solicitar, telefonando precisar, instruções, procurar, Serviço, esclarecer, dividas 13 horas N o 28/01/2021 11 horas Sim Sim N o N o

1/27/2021 3:57:24 N o SIM, aceito participar. Si 1963 Sim Ensino médio completo (colegial). Sudeste Casado(a) / Vive junto 4 Feminino N o Sim Sim 59 151 Sim Sim, às vezes. N o Menos de 1 ano. N o, n o tenho nenhuma dessas doenças 3 est mago raio x, vazio durar, horas pequeno, café a meia-noite, comer, nada, fazer café da manhã beba, sua pergunta, o departamento poder compreendo, transmitir, importantes, diagnóstico entendi, alterações o, dez, ciente que, adaptar, direito, solicitar, telefonando precisar, instruções, procurar, Serviço, esclarecer, dividas 13 horas N o 28/01/2021 11:00 horas N o N o N o N o

1/27/2021 8:30:13 N o SIM, aceito participar. MA 1970 Sim Ensino médio completo (colegial). Sudeste Separado(a) / Divorciado(a) 3 Feminino Sim Sim Sim 85 150 N o N o. N o Mais de 10 anos. N o, n o tenho nenhuma dessas doenças 1 est mago raio x, vazio durar, horas pequeno, café a meia-noite, comer, nada, fazer café da manhã beba, sua pergunta, o departamento poder compreendo, transmitir, importantes, diagnóstico entendi, alterações o, dez, ciente que, adaptar, direito, solicitar, telefonando precisar, instruções, procurar, Serviço, esclarecer,

r, d□ vidas 13 N□ o 28/01/2021 11 N□ o N□ o N□ o N□ o  
1/27/2021 9:25:46 N□ o SIM, aceito participar. JU 1975 Sim P□ s-Gradua□ □ o (especializa□ □ o, mestrado e/ou doutorado). Sudeste Casado(a) / Vive junto 3 Feminino Sou aposentado(a) / pensionista Sim Sim 120 165 N□ o Sim, □ s vezes. Sim Mais de 10 anos. Diabetes, Infarto, AVC (derrame), Outra que n□ o est□ entre as op□ □ es de res posta 7 est□ mago raio x, vazio durar, horas pequeno, caf□ a meia-noite, comer, nada, fazer caf□ da manh□ beba, □ gua pergunta, o departamento poder compreendo, transmitir, importantes, diagn□ stico entendi, altera□ □ o, dez, ciente que, adaptar, direito, solicitar, telefonando precisar, instru□ □ es, procurar, Servi□ o, esclarecer, d□ vidas As 13:00 N□ o 28/01/2021 As 11:00 N□ o N□ o N□ o Sim

1/27/2021 10:48:37 N□ o SIM, aceito participar. Jo 1972 Sim P□ s-Gradua□ □ o (especializa□ □ o, mestrado e/ou doutorado). Sul Casado(a) / Vive junto 3 Feminino N□ o Sim Sim 97 170 N□ o N□ o. N□ o Mais de 10 anos. Diab etes, Outra que n□ o est□ entre as op□ □ es de resposta 18 est□ mago raio x, vazio durar, horas pequeno, caf□ a meia-noite, comer, nada, fazer caf□ da manh□ beba, □ gua pergunta, o departamento poder compreendo, transmiti r, importantes, diagn□ stico entendi, altera□ □ o, dez, ciente que, adaptar, direito, solicitar, telefonando precisar, ins tru□ □ es, procurar, Servi□ o, esclarecer, d□ vidas 13h N□ o 28/01/2021 11h Sim Sim N□ o N□ o

1/27/2021 10:53:19 N□ o SIM, aceito participar. Lu 1986 Sim Ensino m□ dio completo (colegial). Centro-Oeste Sol teiro(a) 4 Feminino N□ o Sim Sim 49 157 N□ o Sim, □ s vezes. N□ o Mais de 10 anos. Diabetes, Infarto, AVC (der rame), Doen□ a nos rins, Outra que n□ o est□ entre as op□ □ es de resposta 8 est□ mago raio x, vazio durar, horas pequeno, caf□ a meia-noite, comer, nada, fazer caf□ da manh□ beba, □ gua pergunta, o departamento poder com preendo, transmitir, importantes, diagn□ stico entendi, altera□ □ o, dez, ciente que, adaptar, direito, solicitar, telefon ando precisar, instru□ □ es, procurar, Servi□ o, esclarecer, d□ vidas 13 horas N□ o 27/01/2021 11 horas N□ o N □ o N□ o Sim

1/27/2021 11:43:38 N□ o SIM, aceito participar. Ut 1971 Sim Ensino m□ dio completo (colegial). Sudeste Casado( a) / Vive junto 3 Feminino N□ o Sim Sim 73 171 N□ o Sim, □ s vezes. N□ o 1 a 5 anos. Outra que n□ o est□ entre as op□ □ es de resposta 5 est□ mago raio x, vazio durar, horas pequeno, caf□ a meia-noite, comer, nada, fazer caf □ da manh□ beba, □ gua pergunta, o departamento poder compreendo, transmitir, importantes, diagn□ stico enten di, altera□ □ o, dez, ciente que, adaptar, direito, solicitar, telefonando precisar, instru□ □ es, procurar, Servi□ o, esc larecer, d□ vidas 13 N□ o 28/01/2021 11 N□ o N□ o N□ o N□ o

1/27/2021 12:27:35 N□ o SIM, aceito participar. IA 1964 Sim P□ s-Gradua□ □ o (especializa□ □ o, mestrado e/ou doutorado). Nordeste Casado(a) / Vive junto 2 Feminino Sou aposentado(a) / pensionista Sim Sim 70 150 N□ o N□ o. N□ o 5 a 10 anos. N□ o, n□ o tenho nenhuma dessas doen□ as 2 est□ mago raio x, vazio durar, horas pequeno, c af□ a meia-noite, comer, nada, fazer caf□ da manh□ beba, □ gua pergunta, o departamento poder compreendo, tra nsmitir, importantes, diagn□ stico entendi, altera□ □ o, dez, ciente que, adaptar, direito, solicitar, telefonando precis ar, instru□ □ es, procurar, Servi□ o, esclarecer, d□ vidas 13h N□ o 28/01/2021 11h N□ o Sim N□ o Sim

1/27/2021 13:37:06 N□ o SIM, aceito participar. MA 1960 Sim Ensino m□ dio completo (colegial). Sudeste Casado (a) / Vive junto 3 Feminino Sou aposentado(a) / pensionista Sim Sim 78 169 N□ o Sim, □ s vezes. N□ o 1 a 5 anos. N□ o, n□ o tenho nenhuma dessas doen□ as 4 est□ mago raio x, vazio durar, horas pequeno, caf□ a meia-noite, co mer, nada, fazer caf□ da manh□ beba, □ gua pergunta, o departamento poder compreendo, transmitir, importantes, diagn□ stico entendi, altera□ □ o, dez, ciente que, adaptar, direito, solicitar, telefonando precisar, instru□ □ es, pro curar, Servi□ o, esclarecer, d□ vidas 13 N□ o 28/01/2021 12 N□ o N□ o N□ o N□ o

1/27/2021 13:45:14 N□ o SIM, aceito participar. Fa 1965 Sim Ensino fundamental completo. Nordeste Casado(a) / Vive junto 3 Feminino N□ o Sim Sim 85 147 N□ o N□ o. Sim 5 a 10 anos. Diabetes 3 est□ mago raio x, vazio dura r, horas pequeno, caf□ a meia-noite, comer, nada, fazer caf□ da manh□ beba, □ gua pergunta, o departamento pod er compreendo, transmitir, importantes, diagn□ stico entendi, altera□ □ o, dez, ciente que, adaptar, direito, solicitar, telefonando precisar, instru□ □ es, procurar, Servi□ o, esclarecer, d□ vidas 4 vezes ao dia Sim 29/01/2021 11:00hrs Sim Sim N□ o N□ o

1/27/2021 14:03:43 N□ o SIM, aceito participar. Ma 63 Sim Ensino fundamental completo. Sul Casado(a) / Vive ju nto 2 Feminino Sou aposentado(a) / pensionista Sim Sim 69 150 Sim Sim, □ s vezes. N□ o Mais de 10 anos. Outra que n□ o est□ entre as op□ □ es de resposta 4 est□ mago raio x, vazio durar, horas pequeno, caf□ a meia-noite, co mer, nada, fazer caf□ da manh□ beba, □ gua pergunta, o departamento poder compreendo, transmitir, importantes, diagn□ stico entendi, altera□ □ o, dez, ciente que, adaptar, direito, solicitar, telefonando precisar, instru□ □ es, pro curar, Servi□ o, esclarecer, d□ vidas 13.00 Sim 27/01/2021 11.30 Sim Sim Sim Sim

1/27/2021 14:27:52 N□ o SIM, aceito participar. Ed 1961 Sim Ensino fundamental completo. Nordeste Solteiro(a) 2 Feminino N□ o Sim Sim 71 161 N□ o Sim, □ s vezes. N□ o 5 a 10 anos. Outra que n□ o est□ entre as op□ □ es d e resposta 5 pontos raio x, vazio durar, horas pequeno, caf□ a meia-noite, comer, nada, fazer caf□ da manh□ beba, □ gua pergunta, o departamento poder compreendo, transmitir, importantes, diagn□ stico entendi, altera□ □ o, dez,

ciente que, adaptar, direito, solicitar, telefonando precisar, instruções, procurar, Serviço, esclarecer, devidas 13 N o 28/01/2021 11 N o N o N o Sim

1/27/2021 17:43:07 N o SIM, aceito participar. MA 1965 Sim Pós-Graduação (especialização, mestrado e/ou doutorado). Nordeste Solteiro(a) 1 Feminino Sim Sim Sim 70 150 N o Sim, às vezes. N o 1 a 5 anos. N o, n o tenho nenhuma dessas doenças 3 estômago raio x, vazio durar, horas pequeno, café a meia-noite, comer, nada, fazer café da manhã beba, sua pergunta, o departamento poder compreendo, transmitir, importantes, diagnóstico entendi, alteração, dez, ciente que, adaptar, direito, solicitar, telefonando precisar, instruções, procurar, Serviço, esclarecer, devidas 1 N o 28/01/2021 11 Sim Sim N o N o

1/27/2021 18:42:24 N o SIM, aceito participar. An 1970 Sim Ensino superior completo (faculdade/universidade). Nordeste Casado(a) / Vive junto 7 Feminino N o Sim Sim 105 171 N o Sim, às vezes. Sim 5 a 10 anos. N o, n o tenho nenhuma dessas doenças 3 estômago raio x, vazio durar, horas pequeno, café a meia-noite, comer, nada, fazer café da manhã beba, sua pergunta, o departamento poder compreendo, transmitir, importantes, diagnóstico entendi, alteração, dez, ciente que, adaptar, direito, solicitar, telefonando precisar, instruções, procurar, Serviço, esclarecer, devidas 13 N o 28/01/2021 11 Sim Sim N o N o

1/27/2021 19:06:56 N o SIM, aceito participar. Ma 1964 Sim Ensino médio completo (colegial). Nordeste Solteiro(a) 2 Feminino Sou aposentado(a) / pensionista Sim Sim 78 160 N o Sim, às vezes. Sim 5 a 10 anos. Diabetes 4 estômago raio x, vazio durar, horas pequeno, café a meia-noite, comer, nada, fazer café da manhã beba, sua pergunta, o departamento poder compreendo, transmitir, importantes, diagnóstico entendi, alteração, dez, ciente que, adaptar, direito, solicitar, telefonando precisar, instruções, procurar, Serviço, esclarecer, devidas As 13:00 N o 06/01/2021 11:00 N o N o N o N o

1/27/2021 20:11:04 N o SIM, aceito participar. Na 1960 Sim Ensino médio completo (colegial). Nordeste Casado(a) / Vive junto 5 Feminino Sou aposentado(a) / pensionista Sim Sim 63 157 N o N o. N o 1 a 5 anos. Diabetes, Infarto 12 diabetes raio x, vazio durar, horas pequeno, café a meia-noite, comer, nada, fazer café da manhã beba, sua resposta, disque poder compreendo, transmitir, importantes, diagnóstico estabelecido, custo, cinco, devedor que, adaptar, direito, solicitar, telefonando precisar, instruções, procurar, Serviço, esclarecer, devidas 19 horas Sim 04/02/2021 12 horas Sim Sim N o Sim

1/27/2021 20:41:27 N o SIM, aceito participar. CC10 1957 Sim Ensino médio completo (colegial). Sudeste Separado(a) / Divorciado(a) 4 Feminino N o Sim Sim 78 160 Sim Sim, às vezes. Sim Mais de 10 anos. N o, n o tenho nenhuma dessas doenças 1 estômago raio x, vazio durar, horas pequeno, café a meia-noite, comer, nada, fazer café da manhã beba, sua pergunta, o departamento poder compreendo, transmitir, importantes, diagnóstico entendi, alteração, dez, ciente que, adaptar, direito, solicitar, telefonando precisar, instruções, procurar, Serviço, esclarecer, devidas As 13h N o 27/01/2021 11h N o N o N o Sim

1/27/2021 21:40:10 N o SIM, aceito participar. RC 1967 Sim Pós-Graduação (especialização, mestrado e/ou doutorado). Sudeste Casado(a) / Vive junto 2 Feminino N o Sim Sim 67 160 N o Sim, às vezes. N o 5 a 10 anos. N o, n o tenho nenhuma dessas doenças 3 estômago raio x, vazio durar, horas pequeno, café a meia-noite, comer, nada, fazer café da manhã beba, sua pergunta, o departamento poder compreendo, transmitir, importantes, diagnóstico entendi, alteração, dez, ciente que, adaptar, direito, solicitar, telefonando precisar, instruções, procurar, Serviço, esclarecer, devidas 13 horas N o 28/01/2021 11 horas N o N o N o N o

1/27/2021 22:05:04 N o SIM, aceito participar. Va 1975 Sim Ensino médio completo (colegial). Norte Solteiro(a) 2 Feminino Sim Sim Sim 120 163 N o N o. N o 5 a 10 anos. Diabetes 6 estômago raio x, vazio durar, horas pequeno, café a meia-noite, comer, nada, fazer café da manhã beba, sua pergunta, o departamento poder compreendo, transmitir, importantes, diagnóstico entendi, alteração, dez, ciente que, adaptar, direito, solicitar, telefonando precisar, instruções, procurar, Serviço, esclarecer, devidas 13 hrs Sim 28/01/2021 11 hrs Sim Sim N o N o

1/27/2021 22:25:07 N o SIM, aceito participar. De 1985 Sim Ensino superior completo (faculdade/universidade). Sul Separado(a) / Divorciado(a) 8 Feminino N o Sim Sim 76 173 Sim Sim, às vezes. N o 5 a 10 anos. N o, n o tenho nenhuma dessas doenças 1 estômago raio x, vazio durar, horas pequeno, café a meia-noite, comer, nada, fazer café da manhã beba, sua pergunta, o departamento poder compreendo, transmitir, importantes, diagnóstico entendi, alteração, dez, ciente que, adaptar, direito, solicitar, telefonando precisar, instruções, procurar, Serviço, esclarecer, devidas 13 N o 28/01/2021 11 N o Sim N o N o

1/27/2021 22:53:12 N o SIM, aceito participar. AM 1953 Sim Ensino médio completo (colegial). Nordeste Separado(a) / Divorciado(a) 1 Feminino Sou aposentado(a) / pensionista Sim Sim 75 162 Sim N o. N o 1 a 5 anos. N o, n o tenho nenhuma dessas doenças 0 estômago raio x, vazio durar, horas caldo, lentes a meia-noite, comer, nada, fazer café da manhã beba, sua pergunta, o departamento poder compreendo, transmitir, importantes, diagnóstico entendi, alteração, dez, ciente que, adaptar, direito, solicitar, telefonando precisar, instruções, procurar



, Servi o, esclarecer, d vidas 13 N o 28/01/2021 11 Sim N o N o N o  
1/28/2021 1:04:23 N o SIM, aceito participar. Ed 1964 Sim P s-Gradua o (especializa o, mestrado e/ou doutorado). Nordeste Solteiro(a) 3 Feminino Sim Sim Sim 108 170 N o N o. N o 5 a 10 anos. Outra que n o e st entre as op es de resposta 3 est mago raio x, vazio durar, horas pequeno, caf a meia-noite, comer, nada, fazer caf da manh beba, gua pergunta, o departamento poder compreendo, transmitir, importantes, diagn stico entendi, altera o, dez, ciente que, adaptar, direito, solicitar, telefonando precisar, instru es, procurar, Servi o, esclarecer, d vidas 13h N o 28/01/2021 11h N o N o N o N o  
1/28/2021 3:54:16 N o SIM, aceito participar. De 1972 Sim Ensino m dio completo (colegial). Nordeste Casado(a) / Vive junto 3 Feminino Sou aposentado(a) / pensionista Sim Sim 65 155 N o Sim, frequentemente. Sim 1 a 5 anos. N o, n o tenho nenhuma dessas doen as 0 pontos raio x, vazio durar, horas pequeno, caf a meia-noite, comer, nada, fazer caf da manh beba, gua pergunta, o departamento poder compreendo, transmitir, importantes, diagn stico entendi, altera o, dez, ciente isto, ocupar, esquerdo, falhar, lendo precisar, instru es, procurar, Servi o, esclarecer, d vidas 13 N o 28/01/2021 1 Sim Sim Sim N o  
1/28/2021 6:37:18 N o SIM, aceito participar. El 1952 Sim Ensino m dio completo (colegial). Sudeste Vi vo(a) 3 Feminino Sou aposentado(a) / pensionista Sim Sim 54 148 N o N o. N o 1 a 5 anos. N o, n o tenho nenhuma dessas doen as 0 diabetes livro, asma durar, horas pequeno, caf a meia-noite, comer, nada, fazer caf da ma nh dirija, cora o resposta, disque cabelo compreendo, transmitir, importantes, diagn stico entendi, altera o, dez, ciente que, adaptar, direito, solicitar, telefonando precisar, instru es, procurar, Servi o, esclarecer, d vidas 13 N o 03/02/2021 11 N o N o N o N o  
1/28/2021 7:00:22 N o SIM, aceito participar. Ji 1969 Sim Ensino superior completo (faculdade/universidade). Su deste Separado(a) / Divorciado(a) 2 Feminino Sim Sim Sim 83 154 N o N o. N o 5 a 10 anos. N o, n o tenh o nenhuma dessas doen as 1 est mago raio x, vazio durar, horas pequeno, caf a meia-noite, comer, nada, fazer caf da manh beba, gua pergunta, o departamento poder compreendo, transmitir, importantes, diagn stico ent endi, altera o, dez, ciente que, adaptar, direito, solicitar, telefonando precisar, instru es, procurar, Servi o, e sclarecer, d vidas 13 Sim 28/01/2021 11 Sim Sim Sim Sim  
1/28/2021 9:25:54 N o SIM, aceito participar. Re 1957 Sim Ensino m dio completo (colegial). Sul Separado(a) / Divorciado(a) 4 Feminino N o Sim Sim 77 166 Sim N o. N o Mais de 10 anos. N o, n o tenho nenhuma des sas doen as 3 est mago raio x, vazio durar, horas pequeno, caf a meia-noite, comer, nada, fazer caf da manh beba, gua pergunta, o departamento poder compreendo, transmitir, importantes, diagn stico entendi, altera o, dez, ciente que, adaptar, direito, solicitar, telefonando precisar, instru es, procurar, Servi o, esclarecer, d vidas 13h N o 28/01/2021 11h N o N o N o N o  
1/28/2021 12:20:27 N o SIM, aceito participar. D 1968 Sim Ensino superior completo (faculdade/universidade). Sudeste Separado(a) / Divorciado(a) 2 Feminino N o Sim Sim 57 158 Sim N o. N o 1 a 5 anos. AVC (derrame ) 2 est mago raio x, vazio durar, horas pequeno, caf a meia-noite, comer, nada, fazer caf da manh beba, g ua pergunta, o departamento poder compreendo, transmitir, importantes, diagn stico entendi, altera o, dez, cien te que, adaptar, direito, solicitar, telefonando precisar, instru es, procurar, Servi o, esclarecer, d vidas 13 N o 04/03/2021 11 N o N o N o N o  
1/28/2021 13:20:03 N o SIM, aceito participar. An 1989 Sim Ensino m dio completo (colegial). Sul Separado(a) / Divorciado(a) 2 Feminino Sim Sim Sim 67 154 N o N o. Sim Mais de 10 anos. N o, n o tenho nenhuma des sas doen as 3 est mago raio x, vazio durar, horas pequeno, caf a meia-noite, comer, nada, fazer caf da manh beba, gua pergunta, o departamento poder compreendo, transmitir, importantes, diagn stico entendi, altera o, dez, ciente que, adaptar, direito, solicitar, telefonando precisar, instru es, procurar, Servi o, esclarecer, d vidas 13 horas N o 04/02/2021 11 horas N o N o N o N o  
1/28/2021 14:52:29 N o SIM, aceito participar. LR 1972 Sim P s-Gradua o (especializa o, mestrado e/ou doutorado). Sul Separado(a) / Divorciado(a) 2 Feminino Sim Sim Sim 126 175 N o Sim, s vezes. Sim 1 a 5 ano s. N o, n o tenho nenhuma dessas doen as 0 est mago raio x, vazio durar, horas pequeno, caf a meia-noite, comer, nada, fazer caf da manh beba, gua pergunta, o departamento poder compreendo, transmitir, important es, diagn stico entendi, altera o, dez, ciente que, adaptar, direito, solicitar, telefonando precisar, instru es, p rocurar, Servi o, esclarecer, d vidas 13 Sim 04/02/2021 11 Sim Sim N o Sim  
1/28/2021 16:45:44 N o SIM, aceito participar. Id 1978 Sim Ensino superior completo (faculdade/universidade). S udeste Solteiro(a) 1 Feminino Sim Sim Sim 100 170 N o Sim, s vezes. N o 5 a 10 anos. Diabetes 5 est mago raio x, vazio durar, horas pequeno, caf a meia-noite, comer, nada, fazer caf da manh beba, gua pergunta, o departamento poder compreendo, transmitir, importantes, diagn stico entendi, altera o, dez, ciente que, adaptar , direito, solicitar, telefonando precisar, instru es, procurar, Servi o, esclarecer, d vidas 13 N o 04/02/2021 11 Sim Sim N o N o

1/28/2021 17:05:34 N o SIM, aceito participar. Ve 1945 Sim Ensino superior completo (faculdade/universidade). Sudeste Separado(a) / Divorciado(a) 1 Feminino Sou aposentado(a) / pensionista Sim Sim 72 153 N o Sim, s vezes. N o Mais de 10 anos. N o, n o tenho nenhuma dessas doen as 6 est mago raio x, vazio durar, horas pequeno, caf a meia-noite, comer, nada, fazer caf da manh beba, gua pergunta, o departamento poder compreendo, transmitir, importantes, diagn stico entendi, altera o, dez, ciente que, adaptar, direito, solicitar, telefonando precisar, instru es, procurar, Servi o, esclarecer, d vidas 13 N o 04/02/2021 11 N o N o N o N o

1/28/2021 17:45:39 N o SIM, aceito participar. Lu 1963 Sim Ensino superior completo (faculdade/universidade). Sudeste Casado(a) / Vive junto 3 Feminino N o Sim Sim 79 164 N o Sim, s vezes. N o 5 a 10 anos. N o, n o tenho nenhuma dessas doen as 2 est mago raio x, vazio durar, horas pequeno, caf a meia-noite, comer, nada, fazer caf da manh beba, gua pergunta, o departamento poder compreendo, transmitir, importantes, diagn stico entendi, altera o, dez, ciente que, adaptar, direito, solicitar, telefonando precisar, instru es, procurar, Servi o, esclarecer, d vidas 13 N o 04/02/2021 11 N o N o N o N o

1/28/2021 17:47:33 N o SIM, aceito participar. SP 1969 Sim Ensino fundamental completo. Sul Casado(a) / Vive junto 2 Feminino N o Sim Sim 70 154 N o Sim, s vezes. Sim Mais de 10 anos. N o, n o tenho nenhuma dessas doen as 3 est mago raio x, vazio durar, horas pequeno, caf a meia-noite, comer, nada, fazer caf da manh beba, gua pergunta, o departamento poder compreendo, transmitir, importantes, diagn stico entendi, altera o, dez, ciente que, adaptar, direito, solicitar, telefonando precisar, instru es, procurar, Servi o, esclarecer, d vidas 14hrs N o 04/02/2021 11hrs N o N o N o N o

1/28/2021 18:16:29 N o SIM, aceito participar. An 70 Sim Ensino fundamental completo. Sudeste Solteiro(a) 2 Feminino Sim Sim Sim 107 166 N o Sim, s vezes. N o Mais de 10 anos. N o, n o tenho nenhuma dessas doen as 2 est mago raio x, vazio durar, horas pequeno, caf a meia-noite, comer, nada, fazer caf da manh beba, gua pergunta, o departamento poder compreendo, transmitir, importantes, diagn stico entendi, altera o, dez, ciente que, adaptar, direito, solicitar, telefonando precisar, instru es, procurar, Servi o, esclarecer, d vidas 13 N o 04/02/2021 11 Sim Sim N o N o

1/28/2021 18:47:08 N o SIM, aceito participar. GI 1974 Sim P s-Gradua o (especializa o, mestrado e/ou doutorado). Sudeste Casado(a) / Vive junto 3 Feminino Sim Sim Sim 99 163 N o N o. N o 1 a 5 anos. Outra que n o est entre as op es de resposta 1 est mago raio x, vazio durar, horas pequeno, caf a meia-noite, comer, nada, fazer caf da manh beba, gua pergunta, o departamento poder compreendo, transmitir, importantes, diagn stico entendi, altera o, dez, ciente que, adaptar, direito, solicitar, telefonando precisar, instru es, procurar, Servi o, esclarecer, d vidas 13 N o 04/02/2021 11 N o N o N o N o

1/28/2021 19:00:05 N o SIM, aceito participar. Re 1973 Sim Ensino m dio completo (colegial). Sudeste Casado(a) / Vive junto 4 Feminino N o Sim Sim 60 158 Sim N o. Sim 5 a 10 anos. Doen a nos rins, Outra que n o est entre as op es de resposta 0 est mago raio x, vazio durar, horas pequeno, caf a meia-noite, comer, nada, fazer caf da manh beba, gua pergunta, o departamento poder compreendo, transmitir, importantes, diagn stico entendi, altera o, dez, ciente que, adaptar, direito, solicitar, telefonando precisar, instru es, procurar, Servi o, esclarecer, d vidas 14 horas Sim 28/01/2021 11 horas Sim Sim Sim Sim

1/28/2021 19:03:14 N o SIM, aceito participar. Li 1980 Sim Ensino superior completo (faculdade/universidade). Nordeste Solteiro(a) 2 Feminino Sim Sim Sim 105 170 N o N o. N o 1 a 5 anos. Diabetes 7 est mago raio x, vazio durar, horas pequeno, caf a meia-noite, comer, nada, fazer caf da manh beba, gua pergunta, o departamento poder compreendo, transmitir, importantes, diagn stico entendi, altera o, dez, ciente que, adaptar, direito, solicitar, telefonando precisar, instru es, procurar, Servi o, esclarecer, d vidas 13 N o 28/01/2021 11 Sim Sim m N o N o

1/28/2021 19:40:14 N o SIM, aceito participar. SO 1954 Sim Ensino superior completo (faculdade/universidade). Sudeste Solteiro(a) 1 Feminino Sim Sim Sim 72 163 N o Sim, s vezes. N o Mais de 10 anos. N o, n o tenho nenhuma dessas doen as 3 est mago raio x, vazio durar, horas pequeno, caf a meia-noite, comer, nada, fazer caf da manh beba, gua pergunta, o departamento poder compreendo, transmitir, importantes, diagn stico entendi, altera o, dez, ciente que, adaptar, direito, solicitar, telefonando precisar, instru es, procurar, Servi o, esclarecer, d vidas 13 horas N o 26/02/2021 1100 hs N o Sim N o Sim

1/28/2021 20:40:29 N o SIM, aceito participar. AL 1977 Sim P s-Gradua o (especializa o, mestrado e/ou doutorado). Norte Solteiro(a) 4 Feminino Sim Sim Sim 113 170 N o N o. N o 5 a 10 anos. Diabetes 2 est mago raio x, vazio durar, horas pequeno, caf a meia-noite, comer, nada, fazer caf da manh beba, gua pergunta, o departamento poder compreendo, transmitir, importantes, diagn stico entendi, altera o, dez, ciente que, adaptar, direito, solicitar, telefonando precisar, instru es, procurar, Servi o, esclarecer, d vidas 13h N o 04/02/2021 11h Sim Sim Sim N o

1/28/2021 21:15:40 N o SIM, aceito participar. Ju 1977 Sim Ensino m dio completo (colegial). Sudeste Solteiro(a) 3 Feminino Sim Sim Sim 85 168 N o Sim, s vezes. N o Mais de 10 anos. Outra que n o est entre as op es de resposta 4 est mago raio x, vazio durar, horas pequeno, caf a meia-noite, comer, nada, fazer caf da manh beba, gua pergunta, o departamento poder compreendo, transmitir, importantes, diagn stico entendi, altera o, dez, ciente que, adaptar, direito, solicitar, telefonando precisar, instru es, procurar, Servi o, esclarecer, d vidas 13 horas N o 04/02/2021 11 horas N o Sim N o Sim

1/28/2021 21:47:57 N o SIM, aceito participar. Sa 1965 Sim Ensino m dio completo (colegial). Sudeste Casado(a) / Vive junto 5 Feminino N o Sim Sim 70 152 Sim N o. N o Mais de 10 anos. Outra que n o est entre as op es de resposta 3 est mago raio x, vazio durar, horas pequeno, caf a meia-noite, comer, nada, fazer caf da manh beba, gua pergunta, o departamento poder compreendo, transmitir, importantes, diagn stico entendi, altera o, dez, ciente que, adaptar, direito, solicitar, telefonando precisar, instru es, procurar, Servi o, esclarecer, d vidas 13 N o 28/01/2021 11 N o N o N o N o

1/28/2021 22:27:27 N o SIM, aceito participar. Si 19/04/1972 Sim Ensino m dio completo (colegial). Sudeste Separado(a) / Divorciado(a) 3 Feminino Sim Sim Sim 82 170 N o Sim, s vezes. N o 5 a 10 anos. N o, n o tenho nenhuma dessas doen as 2 est mago raio x, vazio durar, horas pequeno, caf a meia-noite, comer, nada, fazer caf da manh beba, gua pergunta, o departamento poder compreendo, transmitir, importantes, diagn stico entendi, altera o, dez, ciente que, adaptar, direito, solicitar, telefonando precisar, instru es, procurar, Servi o, esclarecer, d vidas As 13 hs N o 28/02/2021 11 horas Sim Sim Sim Sim

1/28/2021 23:26:28 N o SIM, aceito participar. Ro 1972 Sim Ensino superior completo (faculdade/universidade). Sul Separado(a) / Divorciado(a) 2 Feminino N o Sim Sim 68 156 N o Sim, s vezes. N o Mais de 10 anos. Outra que n o est entre as op es de resposta 0 est mago raio x, vazio durar, horas pequeno, caf a meia-noite, comer, nada, fazer caf da manh beba, gua pergunta, o departamento poder compreendo, transmitir, importantes, diagn stico entendi, altera o, dez, ciente que, adaptar, direito, solicitar, telefonando precisar, instru es, procurar, Servi o, esclarecer, d vidas 13 N o 04/02/2021 11 Sim Sim Sim Sim

1/28/2021 23:32:40 N o SIM, aceito participar. Ed 79 Sim Ensino m dio completo (colegial). Sudeste Casado(a) / Vive junto 4 Feminino N o Sim Sim 83 158 N o N o. N o 5 a 10 anos. Diabetes 8 est mago raio x, vazio durar, horas pequeno, caf a meia-noite, comer, nada, fazer caf da manh beba, gua pergunta, o departamento poder compreendo, transmitir, importantes, diagn stico entendi, altera o, dez, ciente que, adaptar, direito, solicitar, telefonando precisar, instru es, procurar, Servi o, esclarecer, d vidas 13 horas N o 28/01/2021 11 horas Sim Sim N o Sim

1/28/2021 23:46:13 N o SIM, aceito participar. Li 1971 Sim Ensino m dio completo (colegial). Nordeste Casado(a) / Vive junto 3 Feminino N o Sim Sim 78 158 N o N o. N o Mais de 10 anos. N o, n o tenho nenhuma dessas doen as 3 est mago raio x, vazio durar, horas pequeno, caf a meia-noite, comer, nada, fazer caf da manh beba, gua pergunta, o departamento poder compreendo, transmitir, importantes, diagn stico entendi, altera o, dez, ciente que, adaptar, direito, solicitar, telefonando precisar, instru es, procurar, Servi o, esclarecer, d vidas 13 horas N o 28/01/2021 11 Sim Sim Sim Sim

1/29/2021 0:12:58 N o SIM, aceito participar. Is 1997 Sim Ensino superior completo (faculdade/universidade). Centro-Oeste Solteiro(a) 7 Feminino N o Sim Sim 70 152 N o Sim, s vezes. N o 1 a 5 anos. N o, n o tenho nenhuma dessas doen as 5 est mago raio x, vazio durar, horas pequeno, caf a meia-noite, comer, nada, fazer caf da manh beba, gua pergunta, o departamento poder compreendo, transmitir, importantes, diagn stico entendi, altera o, dez, ciente que, adaptar, direito, solicitar, telefonando precisar, instru es, procurar, Servi o, esclarecer, d vidas 14:00 N o 28/01/2021 11 N o Sim Sim Sim

1/29/2021 0:45:55 N o SIM, aceito participar. Ce 1962 Sim Ensino m dio completo (colegial). Sudeste Separado(a) / Divorciado(a) 2 Feminino Sim Sim Sim 84 150 N o N o. Sim Menos de 1 ano. N o, n o tenho nenhuma dessas doen as 0 est mago raio x, vazio durar, horas pequeno, caf a meia-noite, comer, nada, fazer caf da manh beba, gua pergunta, o departamento poder compreendo, transmitir, importantes, diagn stico entendi, altera o, dez, ciente que, adaptar, direito, solicitar, telefonando precisar, instru es, procurar, Servi o, esclarecer, d vidas 13 horas Sim 29/01/2021 11 horas Sim N o N o Sim

1/29/2021 7:24:10 N o SIM, aceito participar. An 1965 Sim Ensino m dio completo (colegial). Nordeste Casado(a) / Vive junto 05 Feminino N o Sim Sim 66 158 N o Sim, s vezes. N o Mais de 10 anos. Outra que n o est entre as op es de resposta 4 est mago raio x, vazio durar, horas pequeno, caf a meia-noite, comer, nada, fazer caf da manh beba, gua pergunta, o departamento poder compreendo, transmitir, importantes, diagn stico estabelecido, custo, cinco, devedor assim, alimentar, brilho, reciclar, contando precisar, instru es, procurar, Servi o, esclarecer, d vidas 13 N o 11/02/2021 9 Sim Sim Sim Sim

1/29/2021 7:55:38 N o SIM, aceito participar. Cl 1972 Sim Ensino m dio completo (colegial). Sudeste Casado(a)

/ Vive junto 5 Feminino N o Sim Sim 68 165 N o N o. N o Menos de 1 ano. Diabetes, Outra que n o est entre as op es de resposta 5 est mago raio x, vazio durar, horas pequeno, caf a meia-noite, comer, nada, fazer r caf da manh beba, gua pergunta, o departamento poder compreendo, transmitir, importantes, diagn stico e ntendi, altera o, dez, ciente que, adaptar, direito, solicitar, telefonando precisar, instru es, procurar, Servi o , esclarecer, d vidas 13 N o 04/02/2021 11 Sim Sim Sim Sim

1/29/2021 8:25:25 N o SIM, aceito participar. Ju 1976 Sim Ensino m dio completo (colegial). Sudeste Casado(a)

/ Vive junto 3 Feminino Sim Sim Sim 139 178 N o Sim, s vezes. N o 1 a 5 anos. N o, n o tenho nenhuma dessas doen as 3 est mago raio x, vazio durar, horas pequeno, caf a meia-noite, comer, nada, fazer caf da ma nh beba, gua pergunta, o departamento poder compreendo, transmitir, importantes, diagn stico entendi, altera o, dez, ciente que, adaptar, direito, solicitar, telefonando precisar, instru es, procurar, Servi o, esclarecer, d vidas 13:00 N o 03/02/2021 11:00 Sim Sim N o N o

1/29/2021 9:41:17 N o SIM, aceito participar. LE 1977 Sim Ensino m dio completo (colegial). Sudeste Solteiro(a)

) 1 Masculino N o Sim Sim 96 171 Sim Sim, frequentemente. N o Mais de 10 anos. N o, n o tenho nenhuma dessas doen as 2 est mago raio x, vazio durar, horas pequeno, caf a meia-noite, comer, nada, fazer caf da ma nh beba, gua pergunta, o departamento poder compreendo, transmitir, importantes, diagn stico entendi, altera o, dez, ciente que, adaptar, direito, solicitar, telefonando precisar, instru es, procurar, Servi o, esclarecer, d vidas 13 N o 04/02/2021 11 Sim Sim N o Sim

1/29/2021 11:26:32 N o SIM, aceito participar. Kr 1984 Sim Ensino fundamental completo. Centro-Oeste Casado(a)

/ Vive junto 4 Feminino N o Sim Sim 80 155 N o Sim, s vezes. N o Menos de 1 ano. N o, n o tenho nenhuma dessas doen as 0 pontos raio x, vazio durar, horas pequeno, caf a meia-noite, comer, nada, fazer caf da manh beba, gua resposta, disque poder compreendo, transmitir, importantes, diagn stico entendi, altera o, dez, ciente que, adaptar, direito, solicitar, telefonando precisar, instru es, procurar, Servi o, esclarecer, d vida s 7 Sim 29/01/2021 Duas ou tr s hiras ap s refei o Sim Sim N o N o
